1 **Screening of Tau Protein Kinase Inhibitors in a Tauopathy-relevant cell-based model of Tau**  
2 **Hyperphosphorylation and Oligomerization**

3

4 **Hamad Yadikar\*<sup>1,2,4</sup>, Isabel Torres<sup>1</sup>, Gabrielle Aiello<sup>1</sup>, Milin Kurup<sup>1</sup>, Zhihui Yang<sup>1</sup> Fan**  
5 **Lin<sup>1</sup>, Firas Kobeissy<sup>1,3</sup>, Richard Yost<sup>4</sup>, Kevin K. Wang\*<sup>1,5</sup>**

6

7 <sup>1</sup> Program for Neurotrauma, Neuroproteomics & Biomarkers Research, Departments of  
8 Emergency Medicine, Psychiatry, Neuroscience and Chemistry, University of Florida,  
9 Gainesville, FL32611, USA

10 <sup>2</sup>Department of Biological Sciences, Faculty of Science, Kuwait University, P.O. Box 5969, Safat  
11 13060, Kuwait.

12 <sup>3</sup>Faculty of Medicine, American University of Beirut Medical Center, Beirut, Lebanon.

13 <sup>4</sup>Department of Chemistry, Chemistry Laboratory Building, University of Florida, Gainesville,  
14 FL 32611, USA.

15 <sup>5</sup>Brain Rehabilitation research Center, Malcom Randall VA Medical Center, 1601 SW Archer Rd.  
16 Gainesville, FL 32608, USA.

17 \*Correspondence:

18 Kevin Wang, [kwang@ufl.edu](mailto:kwang@ufl.edu) ; phone: +1 (352) 328-7663

19 Hamad Yadikar, [hamad.yadikar@ku.edu.kw](mailto:hamad.yadikar@ku.edu.kw); Phone: 352-900-9687

20

21

22

23

24

## 25 **ABSTRACT**

26 Tauopathies are a class of neurodegenerative disorders characterized by abnormal deposition of  
27 post-translationally modified tau protein in the human brain. Tauopathies are associated with  
28 Alzheimer's disease (AD), chronic traumatic encephalopathy (CTE), and other diseases.  
29 Hyperphosphorylation increases tau tendency to aggregate and forms neurofibrillary tangles  
30 (NFT), a pathological hallmark of AD. In this study, okadaic acid (OA, 100 nM), a protein  
31 phosphatase 1/2A inhibitor, was treated for 24h in mouse neuroblastoma (N2a) and differentiated  
32 rat primary neuronal cortical cell cultures (CTX) to induce tau-hyperphosphorylation and  
33 oligomerization as a cell-based tauopathy model. Following the treatments, the effectiveness of  
34 different kinase inhibitors was assessed using the tauopathy-relevant tau antibodies through tau-  
35 immunoblotting, including the sites: pSer202/pThr205 (AT8), pThr181 (AT270), pSer202 (CP13),  
36 pSer396/pSer404 (PHF-1), and pThr231 (RZ3). OA-treated samples induced tau phosphorylation  
37 and oligomerization at all tested epitopes, forming a monomeric band (46-67 kDa) and oligomeric  
38 bands (170 kDa and 240 kDa). We found that TBB (a casein kinase II inhibitor), AR and LiCl  
39 (GSK-3 inhibitors), cyclosporin A (calcineurin inhibitor), and Saracatinib (Fyn kinase inhibitor)  
40 caused robust inhibition of OA-induced monomeric and oligomeric p-tau in both N2a and CTX  
41 culture. Additionally, a cyclin-dependent kinase 5 inhibitor (Roscovitine) and a calcium chelator  
42 (EGTA) showed conflicting results between the two neuronal cultures. This study provides a  
43 comprehensive view of potential drug candidates (TBB, CsA, AR, and Saracatinib), and their  
44 efficacy against tau hyperphosphorylation and oligomerization processes. These findings warrant  
45 further experimentation, possibly including animal models of tauopathies, which may provide a  
46 putative Neurotherapy for AD, CTE, and other forms of tauopathy-induced neurodegenerative  
47 diseases.

48 **Keywords:** Tau hyperphosphorylation, protein kinase inhibitor, okadaic acid, cell-based model,  
49 Tau oligomerization.

## 50 **Background**

51 Tauopathy is a class of neurodegenerative condition that is associated with pathological  
52 phosphorylated tau protein accumulation in the human brain. Tauopathy has been associated with

53 several clinicopathological conditions, including chronic traumatic encephalopathy (CTE) (1),  
54 traumatic brain injuries (2), post-traumatic stress disorder(3), and Alzheimer's disease (AD)(4, 5).

55       Tau is a structural protein whose function is to promote microtubule stabilization and  
56 assembly, which are controlled by its phosphorylation state (6-8). In humans, the tau gene encodes  
57 the tau protein and is located on chromosome 17q21 (9). The main tau protein is encoded by 11  
58 exons which are subjected to alternative splicing on exon two, three, and ten forming six isoforms.  
59 The six tau isoforms range from 352 to 441 amino acids. Tau isoforms vary in either having zero,  
60 one, or two N-terminal inserts (exons 2 and 3) and three or four repeats region at the C-terminal  
61 region (exon 10) (10, 11).

62       Tau protein consists of 79 potential phosphorylatable Serine and Threonine sites on the  
63 longest isoform. At least thirty tau phosphorylation sites have been reported in healthy conditions.  
64 Tau's phosphorylation state and its ability to interact with microtubule proteins are regulated by  
65 various protein kinases and phosphatases (12, 13). Imbalances in the activities of tau kinases and  
66 phosphatases can cause tau to become hyperphosphorylated at specific residues leading to a higher  
67 tendency to dissociate from microtubules. Abnormally dissociated tau have a higher susceptibility  
68 of forming larger protein aggregates, filament assembly, and bundling of pair helical filaments  
69 (PHF) into neurofibrillary tangles (NFT) leading to cellular neurotoxicity(6-8, 14, 15).

70       Tau phosphorylation is carried out by a host of different kinases under physiological  
71 condition. Abnormal activities of tau kinases have been associated with AD, including kinases  
72 such as Src family kinase, Ca<sup>2+</sup>/calmodulin-dependent protein kinase II (CaMKII); cyclin-  
73 dependent kinase 5 (CDK5); casein kinase (1 $\alpha$ /1 $\delta$ /1 $\epsilon$ /2); dual-specificity tyrosine kinase  
74 phosphorylation and regulated kinase-1A/2 (DYRK1A/2), glycogen synthase-3, and Fyn  
75 kinase(16, 17). Notably, a study reported that hippocampus and temporal cortex regions of the

76 brain have high levels of CKII in AD when compared to controls (18). Furthermore, the tyrosine  
77 kinase Fyn has been highly researched for its implications with tau and neurodegeneration in the  
78 post-synapse N-methyl-D-aspartate receptors (NMDAR)(16, 19-21). Fyn phosphorylates tau in  
79 the N-terminal domain in neurons and plays a fundamental role in the amyloid signal  
80 transduction(16).

81 Several approaches for the treatment of tauopathic conditions have been investigated,  
82 including targeting tau kinases(22), activation of tau phosphatases(23), enhancing microtubule  
83 stabilization(24), tau immunotherapy(25), tau clearance(2), tau aggregation inhibition (26). Since  
84 *in vivo* tau-hyperphosphorylation results from multiple kinase activities, a single effective strategy  
85 to reverse tauopathies is still an open question. The inhibition of tau kinases using pharmaceutical  
86 drugs can lead to decreased levels of the hyperphosphorylated tau protein, thereby less aggregated  
87 tau (27-32). Several tau kinase inhibitors are in clinical trials for the treatment of tauopathies-  
88 related diseases (33). The most progressive protein kinase inhibition approach in the clinic thus far  
89 has been targeted at GSK-3 $\beta$  protein (30, 34).

90 It has been shown in AD and various other tauopathies that, tau is abnormally  
91 phosphorylated at Ser202, Ser396/404, Thr181, Thr205, and Thr231 (35, 36). The phosphorylation  
92 profile of tau residues at Ser202/Thr205 has been well-characterized in AD cases based on using  
93 specific antibodies (37). Analyzing these phosphorylation sites helps to show a pattern of  
94 relationships between tau protein phosphorylation and pathology.

95 Okadaic acid (OA), a protein phosphatase 1 and 2A (PP1/PP2A) inhibitor, induces tau  
96 hyperphosphorylation at pathological sites in both animal and cell-based models (38-40). OA  
97 inhibition of tau phosphatases allows the activation of multiple tau kinases, leading to its

98 hyperphosphorylation (41, 42). Moreover, it has been shown that OA treatment in wild-type mice  
99 causes tauopathy-related abnormality in different regions of the brain (43).

100 In this study, mouse neuroblastoma culture (N2a) and rat primary cerebrocortical neuronal  
101 (CTX) culture was treated with OA, to induce tau hyperphosphorylation and oligomerization  
102 mimicking a tauopathy-relevant condition. In these experiments, we used the OA-induced  
103 tauopathy culture model to screen for different tau kinase inhibitors using immunoblotting and  
104 phospho-specific tau antibodies. Thus, it was hypothesized that using OA-induced tau  
105 hyperphosphorylation and aggregation as a tauopathy model to screen for kinase inhibitors would  
106 translate into putative neurotherapeutic targets for tauopathies-related disorders. Data from this  
107 work has shown that OA-induced tau hyperphosphorylation and oligomerization were inhibited  
108 by the different treatments. This side-by-side overview both highlights targets not well described,  
109 as well corroborates with data from targets previously studied, to be assessed in different relevant  
110 tauopathy-related *in vivo* models.

111

## 112 **Methods**

### 113 **Phosphorylation Inhibitors**

114 Ethylene glycol-bis( $\beta$ -aminoethyl ether)-N,N,N',N'-tetraacetic acid (**EGTA**) (Sigma-Aldrich, St-  
115 Louis, MO, USA), Dithiothreitol (**DTT**) (Sigma-Aldrich), Lithium chloride (**LiCl**) (Sigma-  
116 Aldrich), N-(4-methoxybenzyl)-N'-(5-nitro-1,3-thiazol-2-yl)urea (**AR-A014418**) (Sigma-  
117 Aldrich), (9S,10R,12R)-2,3,9,10,11,12-Hexahydro-10-hydroxy-9-methyl-1-oxo-9,12-epoxy-1H-  
118 diindolo[1,2,3-fg:3',2',1'-kl]pyrrolo[3,4-i][1,6]benzodiazocine-10-carboxylic acid methyl ester  
119 (**K252a**) (Sigma-Aldrich), (2R)-2-1-butanol (**Roscovitine**) (Sigma-Aldrich), 4,5,6,7-Tetrabromo-  
120 2-azabenzimidazole (**TBB**) (Sigma-Aldrich), 1-(7-methoxyquinolin-4-yl)-3-(6-

121 (trifluoromethyl)pyridin-2-yl)urea (**A-1070722**) (Sigma-Aldrich), cyclosporine A (Sigma-  
122 Aldrich), N-(5-chloro-1,3-benzodioxol-4-yl)-7-[2-(4-methylpiperazin-1-yl)ethoxy]-5-  
123 (tetrahydro-2H-pyran-4-yloxy)quinazolin-4-amine (**Saracatinib**) (Selleck Chemicals, Houston  
124 TX), (5S,6R,7R,9R)-6-methoxy-5-methyl-7-(methylamino)-6,7,8,9,15,16-hexahydro-17-oxa-  
125 4b,9a,15-triaza-5,9-methanodibenzo[b,h]cyclonona[jkl]cyclopenta[e]-as-indacen-14(5h)-one  
126 (**STS**) (ab120056; Abcam, Cambridge, MA, USA), Z-Asp-2,6-Dichlorobenzoyloxymethyl Ketone  
127 (**Z-DCB**) (Cayman Chemical, Ann Arbor Michigan) and okadaic acid (Cell Signaling Technology,  
128 Danvers, MA). SNJ-1945 was a gift from (Senju Pharmaceutical Co. Ltd., Kobe, Japan) (**Table**  
129 **1**).

### 130 **Antibodies**

131 The antibodies that were used in this study were: phospho-tau monoclonal antibodies PHF-1  
132 (pSer396/pSer404, 1/1000), CP13 (pSer202, 1/1000), RZ3 (pThr231, 1/1000), AT8  
133 (pSer202/pThr205, 1/1000), AT270 (pThr181, 1/1000) and total tau monoclonal antibodies: DA9  
134 (a.a. 102-140, 1/1000), DA31 (aa150-190, 1/1000) (gift from Peter  
135 Davies, Albert Einstein College of Medicine, Bronx, NY), polyclonal total tau DAKO (aa243-441,  
136 1/5000) (CiteAb, England). Mouse anti- $\alpha$ II-spectrin (ENZO Life Sciences, Farmingdale, NY,  
137 USA, 1/5000).  $\beta$ -actin was used as protein loading evenness control (abcam, Cambridge, MA,  
138 USA, 1/3000) (**Table 2**).

### 139 **Cell lines and media**

140 Brain mouse neuroblastoma N2a cells were purchased from American Type Culture Collection  
141 (ATCC #CRL-2266, Manassas, VA, USA) and were grown as recommended by the manufacturer.  
142 The cells were grown at 1:1 Dulbecco's modified Eagle medium: reduced serum Eagle's minimum  
143 essential media (DMEM: Opti-MEM) supplemented with 5% FBS (Thermo-Fisher), 100 units/mL

144 penicillin and 0.1 mg/mL streptomycin. Cells were incubated at 37°C in a humidified 5% CO<sub>2</sub>-  
145 containing atmosphere.

### 146 **Primary Cerebrocortical neuronal cultures**

147 Rat primary cerebrocortical neuronal culture (CTX; ThermoFisher; Cat. No. A10840) harvested  
148 from a homogenized pool of day ten Sprague–Dawley rat brains and plated on poly-L-lysine-  
149 coated (0.01% (w/v)) 12-well culture plates (Erie Scientific, Portsmouth, NH, USA), similar to  
150 previously described methods[102] at a density of  $4.36 \times 10^5$  cells/ml. Cultures were grown in  
151 Neurobasal® media (Thermo Fisher), supplemented with 1% B-27 (Thermo Fisher), one mM  
152 Glutamine (Thermo Fisher) and incubated at 37° C in a humidified 5% CO<sub>2</sub>-containing  
153 atmosphere. The medium was replaced every three days.

### 154 **Cell treatments**

155 For N2a cell culture treatments, complete media was replaced with serum-free DMEM media. For  
156 CTX primary cultures, all experiments were performed after ten days in culture, and the media  
157 was replaced with Neurobasal® media supplemented with 0.5% B-27. For both CTX and N2a  
158 culture, SNJ-1945 (S, 100 µM) and Z-DCB (Z, 60 µM) were added to all experimental conditions  
159 before the treatment for 1h. This was followed by treatment with okadaic acid (OA; 100 nM) for  
160 24h followed by protein kinase inhibitors for 6h. The protein kinase inhibitors used included:  
161 K252a (10 µM), AR-A014418 (60 µM), A-1070722 (60 µM), Saracatinib (100 µM), LiCl (5 mM)  
162 TBB (30 µM), EGTA (five mM), Roscovitine (60 µM), STS (0.5 µM), CsA (60 µM) (if added)  
163 **(Table 1).**

### 164 **Cell Lysate Collection and Preparation**

165 The culture lysate harvesting for N2a cells and CTX culture were identical. After the treatment,  
166 conditioned media were collected from each well and added into separate tubes on ice and

167 centrifuged at 10,000 x g for 10 min at 4°C. Lysis buffer was added to the attached cells on the 12-  
168 well plates (100 µl per well). The Triton-X lysis buffer included: 1mM DTT, 1% phosphatase  
169 inhibitors (Sigma), 1% Mini-Complete protease inhibitor cocktail tablet (Roche Biochemicals),  
170 and 1% Triton X-100. The attached cells were then scraped down into the lysis buffer and collected  
171 into separate 1.5 ml Eppendorf tubes. The insoluble pellets from the conditioned culture media  
172 were combined with the lysed cells in the lysis buffer. The cell lysates were incubated for 90  
173 minutes at 4°C and then centrifuged at 15,000 rpm for 15 minutes to remove cell debris.

#### 174 **SDS-PAGE and Western blotting**

175 Protein concentrations of cell lysates were determined by bicinchoninic acid microprotein assays  
176 (Pierce Inc., Rockford, IL, USA) against albumin standards. Equal protein samples (20 µg) were  
177 prepared for SDS-PAGE in 8x loading buffer containing 0.25 M Tris (pH 6.8), two mM DTT, 8%  
178 SDS, and 0.02% bromophenol blue. Each sample was subjected to SDS-PAGE electrophoresis on  
179 a 4-20% precast-gels (Bio-Rad) and then transferred on to PVDF membranes. The membranes  
180 were blocked in 5% milk for 1h and then incubated with primary antibodies (1/1000) overnight.  
181 The secondary antibodies (Amersham Biosciences, UK, 1/10,000) anti-rabbit or anti-mouse IgG  
182 conjugated with alkaline phosphatase (Amersham, Piscataway, NJ, USA), were then added for 1h  
183 at room temperature. The blots were then washed with TBST, and immunoreactive bands were  
184 visualized by developing with biotin, avidin-conjugated alkaline phosphatase, nitro blue  
185 tetrazolium, and 5-bromo-4-chloro- 3-indolyl phosphate (BCIT/NBT) developer (KPL,  
186 Gaithersburg, MD, USA). A 250 kDa to 14 kDa rainbow molecular weight marker (RPN800E, GE  
187 Healthcare, Bio-Sciences, Pittsburgh, PA, USA) was loaded in the first well of the electrophoretic  
188 gel to estimate the molecular weight of each band. Quantitative evaluation of protein levels was  
189 performed via computer-assisted densitometric scanning (NIH ImageJ, version 1.6 software).



## 190 **Statistical Analysis**

191 Statistical analysis was performed with one-way ANOVA Tukey's Test. For multiple  
192 comparisons, one-way ANOVA followed by the Bonferroni's post-hoc test was performed.  
193 \* $p < 0.05$ , \*\* $p < 0.01$ , \*\*\* $p < 0.001$ , \*\*\*\*  $p < 0.0001$ , ns: non-significant. GraphPad Prism 8.0  
194 (GraphPad, La Jolla, CA).

## 195 **Results**

196 Okadaic acid (OA), a potent PP2A/PP1 inhibitor, is known to induce tau  
197 hyperphosphorylation and aggregation (43, 44). To establish our tauopathy-relevant cell model,  
198 mouse neuroblastoma N2a cells were treated with okadaic acid (OA) (100 nM) to induce tau  
199 hyperphosphorylation and oligomerization for 6h and 24h (**Figure 1a, b**). This specific  
200 concentration of OA was selected based on other studies that used similar concentrations optimized  
201 on neuronal cell culture (38, 44-46).

202 Since OA is known to induce apoptosis (47), cell-permeable calpain (SNJ-1945) and  
203 caspase-3 (Z-DCB) inhibitors were included in all of our experimental conditions in order to  
204 eliminate modifications resulting from cell metabolism/health (48, 49). To assess cell viability,  
205 caspase-3, and calpain activation, the samples were probed for for  $\alpha$ II-spectrin integrity.  $\alpha$ II-  
206 spectrin is a key substrate for cysteine proteases associated with necrosis (calpain) and apoptotic  
207 (caspase-3) cell death (50). Cleavage of  $\alpha$ II-spectrin by calpain produces major spectrin break  
208 down products (SBDP) of molecular weight 150 kDa (SBDP150) and 145 kDa (SBDP145), while  
209 caspase-3 activation produces major cleavage product of 120 kDa (SBDP120) detectable by  
210 Western blotting (50, 51). Our control samples probed with  $\alpha$ II-spectrin detected only a high  
211 molecular weight 240 kDa band (intact  $\alpha$ II-spectrin); while SBDPs were absent, suggesting a  
212 healthy metabolism and neuronal culture (**Fig1a**). Western blots were analyzed with total tau

213 monoclonal antibody DA9 (a.a. 102-140) and monoclonal phospho-tau antibodies including CP13  
214 (pSer202) and PHF-1 (pSer396/pSer404) (**Table 1**).  $\beta$ -actin was probed to evaluate the evenness  
215 of loading the protein extracts. Untreated control showed that the total tau antibody DA9 detected  
216 tau protein bands at 46 kDa and 48 kDa at 6h and 24h (**Figure 1a**). The intensity of the band at 46  
217 kDa was detected at higher levels compared to the band at 48 kDa in control samples. (**Figure 1a**).

218 Treatment with OA (100 nM) for 6h and 24h showed a dramatic decrease in levels of the  
219 46 kDa and increased levels of 48 kDa with DA9 antibody. One might presume that the 46 kDa  
220 and 48 kDa bands are different tau isoforms. However, how OA treatment affected these bands  
221 suggests that they are representative of phosphorylated (p-tau) and non-phosphorylated tau (tau)  
222 rather than being tau isoforms. Thus, in our study, the 46 kDa was assigned as tau and the 48 kDa  
223 as p-tau.

224 Additionally, treatment with OA showed high molecular weight (HMW) band clusters  
225 residing at 170 kDa probed with DA9 antibody (a.a 102-145) for 6h ( $p < 0.05$ ) and at 24h  
226 ( $p < 0.0005$ ). These (HMW) bands may represent the formation of tau oligomers as they were not  
227 observed in control cells and only with OA-treated cells. It has been reported in a recent study that  
228 treatment with OA in human neuroblastoma SH-SY5Y cells induced tau phosphorylation and  
229 oligomerization (44). Another study showed that a local injection of OA in mice induces tau  
230 phosphorylation and aggregation in different anatomical brain regions (43). Because the tau  
231 phosphorylation and formation of HMW bands were observed relatively at higher levels with OA  
232 treatment for 24h compared to the 6h, the 24h treatment was selected as our tauopathy model  
233 (**Figure 1a, 1b**).

234 On the other hand, in our cell culture experimental conditions, treatment with OA (100  
235 nM) for less than 6h did not show any detectable tau bands with CP13 and PHF-1 (data not shown).

236 It is well-known that OA induces apoptosis in human neuroblastoma cells, mouse neuroblastoma,  
237 and rat cerebellum neurons (47). Thus, the time points were not increased beyond 24h of treatment  
238 to avoid tau phosphorylation modifications resulting from proteolysis and neural death.

239 Probing with CP13 (pSer202) antibody did not show any detectable bands of tau protein in  
240 control samples (**Figure 1a**). This result indicates that endogenous phosphorylation of tau at  
241 Ser202 site is low under normal growth conditions. However, with OA treatment, CP13 showed  
242 HMW band formed at 110 kDa (x2 size of monomeric tau) with 6h and 24h (**Figure 1a, 1b**).  
243 Probing with PHF-1 antibody (pSer396/pSer404) did not show any tau band with control samples  
244 (**Figure 1a, 1b**). Treatment with OA for 6h and 24h showed HMW cluster of bands at 220 kDa,  
245 240 kDa, and 260 kDa with PHF-1 (**Figure 1a, 1b**). Notably, the 260 kDa band (red arrow) (**Figure**  
246 **1a**) was only detectable with OA treatment for 24h (PHF-1).

247 Low molecular weight monomeric tau (LMW-MT) bands were not detected with either  
248 CP13 or PHF-1. It should be noted that the DA9 antibody recognizes total tau epitopes from aa.  
249 102-140. Thus, to identify the same 48 kDa tau species detected with DA9, the phospho-tau  
250 antibody needs to recognize the same epitope. It was assumed that LMW-MT might be either  
251 phosphorylated at sites other than Ser202/Ser396/Ser404, and LMW-MT oligomerized into the  
252 different HMW tau species detected at 110 kDa, 170 kDa, 220 kDa, 240 kDa, and 260 kDa. Indeed,  
253 using RZ3(pThr231) and AT270(pThr181), LMW-MT at 48 kDa and 55 kDa was detected with  
254 OA treatment; respectively (**Supplementary Figure 1a, left panel, OA lane**).

255 Taken together, these data strongly suggest that OA treatment caused protein phosphatase  
256 inhibition inducing the formation of LMW and HMW tau bands, immunoreactive at pSer202  
257 (CP13, 110 kDa), pSer396/pSer404 (PHF-1, 220/240/260 kDa), RZ3 (pThr231, 48 kDa) and

258 AT270 (pThr181, 55 kDa). Based on the molecular weight of each species, the immunoreactivity  
259 with tau antibodies solidifies the notion of tau hyperphosphorylation and oligomerization.

260 **Screening of tau kinase inhibitors on OA-induced tau hyperphosphorylation and**  
261 **oligomerization in N2a cells.**

262 To screen for protein kinase inhibitors as drug candidates for inhibition of OA-induced  
263 hyperphosphorylation and oligomerization, mouse neuroblastoma N2a cells were pre-treated with  
264 OA for 24h followed by treatment with protein kinase inhibitors for 6h. The positive control  
265 included only OA treated cells for 24h. Protein kinase inhibitors used included: LiCl (10 mM),  
266 AR-A014418 (AR) (60  $\mu$ M), A-1070722 (A107)(60  $\mu$ M), K252a (10  $\mu$ M), STS (0.5  $\mu$ M) 4,5,6,7-  
267 tetrabromobenzotriazole (TBB) (60  $\mu$ M), Roscovitine (60  $\mu$ M), Saracatinib (100  $\mu$ M),  
268 cyclosporine A (CsA) (60  $\mu$ M), and EGTA (5 mM) (**Table 1; Figure 2a, 2b**). All conditions were  
269 pre-treated with SNJ-1945 (calpain inhibitor, abbreviated as S; 60  $\mu$ M) and Z-DCB (caspase  
270 inhibitor, abbreviated as Z; 100  $\mu$ M) to minimize apoptotic pathways activation (calpain and  
271 caspase-mediated proteolysis) (48, 52) (**Table 1**). To assess cell integrity, the  $\alpha$ II-spectrin antibody  
272 was used to monitor intact-240 kDa, SBDP150, and SBDP120 that are representatives of  
273 apoptosis, necrosis, calpain, and caspase activation, respectively.

274 **Casein kinase II (CKII) inhibitor: 4,5,6,7-tetrabromobenzotriazole (TBB)**

275 Since aberrant CKII has been reported in AD (53), TBB, a cell-permeable CKII inhibitor,  
276 was selected for the study. Total tau DA9 showed that TBB abolished the 48 kDa band (p-tau) and  
277 the HMW 170 kDa band (tau oligomers), and significantly increased ( $p < 0.0001$ ) levels of the 46  
278 kDa (non-phospho tau) by 85%, compared to OA treatment alone (**Figure 2a, 2b, Table 3**). CP13  
279 (pSer202) antibody showed that TBB eliminated the OA-induced 110 kDa band (oligomeric p-

280 tau). Similarly, PHF-1 antibody (pSer396/pSer404) showed that TBB fully inhibited the formation  
281 of 240 kDa (HMW bands-oligomeric tau) (**Figure 2a, 2b, Table 3**). As a selective casein kinase  
282 II (CKII) inhibitor, TBB showed robustness in inhibiting both OA-induced tau  
283 hyperphosphorylation and oligomerization. Thus, the aim was to evaluate the TBB dose-response  
284 effect on OA-induced tau hyperphosphorylation and oligomerization in N2a neuronal culture. To  
285 achieve this aim, N2a cells were treated with OA for 24h followed by treatment with various  
286 concentrations of TBB (10 nM, 30 nM, 100 nM, 300 nM, 1  $\mu$ M, 3  $\mu$ M, 10  $\mu$ M, and 30  $\mu$ M) for 6h  
287 (**Figure 3a, 3b**). The result shows that treatment with ten micromolars of TBB resulted in 50%  
288 reduction of the 110 kDa (oligomeric p-tau form; CP13), 48 kDa, and 170 kDa bands (monomeric  
289 and oligomeric p-tau, DA9) (**Figure 3a, 3b**). Increasing the concentration of TBB up to 30  $\mu$ M  
290 caused 90% reduction of 48 kDa (monomeric p-tau, DA9), 170 kDa (oligomeric p-tau, DA9) and  
291 110 kDa (oligomeric tau form, CP13) (**Figure 3a, 3b**). As for assessing neuronal culture integrity,  
292 the intact  $\alpha$ II-spectrin band was detected at 240 kDa, and no SBDP150/145 or SBDP120 was  
293 observed with the TBB treated conditions suggesting a healthy culture.

#### 294 **Calcineurin Inhibitor: Cyclosporin A (CsA)**

295 Cyclosporin A (CsA) has been reported to inhibit calcineurin phosphatase activity (PP3) and  
296 CaMKII by blocking the Ca<sup>++</sup> mitochondrial permeability (54) (Table 1). Thus, CsA was selected  
297 in this study as a calcium-dependent kinase inhibitor to assess its effect on OA-induced tau  
298 hyperphosphorylation and oligomerization. Notably, CsA abolished the 48 kDa and 170 kDa  
299 monomeric and oligomeric p-tau of DA9, respectively (**Supplementary Figure 1a**). Moreover,  
300 CsA significantly reduced the protein band at 110 kDa of CP13 (oligomeric p-tau band;  $p < 0.0001$ ),  
301 and 240 kDa of PHF-1 (oligomeric p-tau band) (**Supplementary Figure 1a, b, Table 3**).  
302 Phosphorylation sites at human tau threonine 181 and 231 have been shown to differentiate AD

303 patient from a control subject (35, 55). Hence, RZ3 (pT231) and AT270 (pT181) antibodies were  
304 used to study these sites.

305 RZ3 antibody showed a complete reduction of the 48 kDa band (monomeric p-tau) when cells  
306 were treated with CsA (**Supplementary Figure 1a, b**). As for AT270 antibody, OA-treated  
307 samples showed a band detected at 55 kDa (monomeric p-tau) which was abolished when neurons  
308 were treated with CsA. The 48 kDa and 55 kDa OA-induced bands detected by RZ3 and AT270,  
309 respectively, indicate that tau can have various levels of oligomerization, or can still be  
310 monomeric, depending upon the phosphorylation site tested.  $\beta$ -actin protein levels remained even  
311 in all experimental conditions. As for testing neuronal injury and apoptotic pathway activation,  
312  $\alpha$ II-spectrin blotting did not detect any significant changes of the 240 kDa band (intact form).  
313 Moreover, SBDP150/145 or SBDP120 immunoreactive bands were not detected in all of the  
314 treated samples, indicative of a healthy metabolism.

### 315 **Calcium chelator: EGTA**

316 Another calcium-dependent kinase inhibitor, EGTA, was used as a calcium-chelating agent.  
317 EGTA has a lower binding affinity for  $Mg^{++}$  relative to EDTA, making it more selective for  $Ca^{++}$   
318 ions (56). Total tau DA9 showed that EGTA treatment (with calpain and caspase inhibitors; S+Z)  
319 caused 25% reduction of the 48 kDa band (p-tau), 85% increase of the 46 kDa band (non-phospho-  
320 tau) and 55% reduction of the 170 kDa band (oligomeric p-tau form), compared to OA treatment  
321 alone (**Figure 2a, 2b and Table 3**). Additionally, EGTA caused 90% reduction of 110 kDa band  
322 (oligomeric tau; CP13) and 85% reduction of 240 kDa (oligomeric tau; PHF-1) (**Figure 2a, 2b**  
323 **and Table 3**). As for apoptotic pathway activation,  $\alpha$ II-spectrin antibody did not show any effect  
324 on the 240 kDa band (intact form), and the SBDP150/145 or SBDP120 bands were not detected  
325 with EGTA treatment.

## 326 **Glycogen synthase kinase-3 (GSK-3) inhibitors: LiCl, A-1070722, and AR-1014418**

327        Tau is a substrate of Glycogen synthase kinase-3 (GSK-3)(57), and p-tau phosphorylation  
328 and oligomerization could be inhibited by GSK-3 inhibition. To test this hypothesis, the effects of  
329 small molecule GSK-3 inhibitors, LiCl, A-1070722 (abbreviated as A-107), and AR-1014418  
330 (abbreviated as AR) were examined on OA-induced tau hyperphosphorylation and  
331 oligomerization. Surprisingly, LiCl showed an opposite effect in N2a cell treatment by increasing  
332 levels of 110 kDa band (oligomeric form, CP13; -14%) and levels of 240 kDa band (oligomeric p-  
333 tau, PHF-1; -9%) (**Figure 2a, 2b and Table 3**). As for total tau DA9 antibody, LiCl also showed  
334 an opposite effect by increasing the 48/46 kDa (p-tau/non-phospho-tau) band ratio by 20%, and  
335 the 170 kDa oligomeric tau band by 12%.

336        AR, a thiazole class inhibitor, was shown to decrease insoluble p-tau in the brain stem of  
337 transgenic mice overexpressing a mutant human tau protein (58). In our experimental design, AR  
338 did not show a statistically significant effect on the 240 kDa band (oligomeric p-tau; PHF-1) or  
339 110 kDa band (oligomeric p-tau form; CP13) (**Supplementary Figure 2a, b, Table 3**). Moreover,  
340 probing with total tau DA9 showed that AR treatment caused an adverse effect by increasing the  
341 48 kDa/46 kDa ratio (monomeric tau form; -50%) and reducing the 170 kDa oligomeric form band  
342 by 36% (**Supplementary Figure 2a, b, Table 3**).

343        Another potent GSK-3 inhibitor, A-107 ( $K_i=0.6$  nM for GSK $\alpha$  and GSK-3 $\beta$ ) (59), was  
344 selected for the study. OA followed by A-107 treatment showed 23% reduction of 110 kDa  
345 oligomeric form band (CP13) and non-significant but partial reduction of the 240 kDa oligomeric  
346 p-tau form (PHF-1) compared to OA treatment alone (**Supplementary Figure 2a, b, Table 3**).  
347 Probing with total tau DA9 showed with A-107 treatment, a 13% reduction of 170 kDa band (DA9)  
348 and did not show a statistically significant effect on the 48 kDa band (**Supplementary Figure 2a,**

349 **b, Table 3**). As for caspase-3, calpain, and cell injury activation,  $\alpha$ II-spectrin did not show SBDP  
350 150/145 or SBDP120 post-treatment, indicative of a healthy neuronal culture.

### 351 **Src/Fyn kinase inhibitor: Saracatinib**

352 Saracatinib is an inhibitor of the Src/abl kinase family, developed initially for several types of  
353 cancer but withdrawn for the lack of effectiveness (60). However, Saracatinib is also a potent  
354 inhibitor of Fyn kinase, which is linked to tau (16). Fyn has been reported to phosphorylate  
355 dendritic tau, which allows Fyn to localize to the post-synaptic density (16). In the current study,  
356 Saracatinib was selected to investigate the role of Fyn kinase function on the tauopathy-relevant  
357 cell-based model. Probing with DA9 (a.a. 102-140) antibody, Saracatinib resulted in 40%  
358 reduction in the 48 kDa (monomeric p-tau), 20% increase in 46 kDa (non-phospho tau) bands and  
359 45% reduction of the 170 kDa band (oligomeric p-tau form) (**Figure 2a, 2b, Table 3**). Saracatinib  
360 treatment caused significant reduction ( $p<0.0001$ ) of the 110 kDa oligomeric p-tau band of CP13  
361 (75%; CP13) and produced 46% reduction in immunoreactivity of the 240 kDa (oligomeric p-tau  
362 form band of PHF-1) (**Figure 2a, 2b, Table 3**). As for assessing cell integrity, intact spectrin (240  
363 kDa) levels remained constant, and SBDP150/145 and SBDP120 levels were not significantly  
364 altered, with Saracatinib treatment, compared to control values.

### 365 **Pan kinase inhibitor: K252a and STS**

366 K252a is a non-selective cell-permeable protein kinase inhibitor, inhibiting protein kinase C (PKC;  
367  $IC_{50}=32.9$  nM),  $Ca^{2+}$ /calmodulin-stimulated phosphodiesterases ( $IC_{50}=1.3-2.9$   $\mu$ M),  
368 serine/threonine protein kinases ( $IC_{50}=10-20$  nM), myosin light-chain kinase (MLCK;  $K_i=20$   
369 nM), receptor tyrosine kinases, and inhibiting the carcinogenic properties of MET oncogene (61,  
370 62). K252a is an analog of staurosporine (STS) and has a broad spectrum of protein kinases



371 inhibition, neuroprotection properties, and improvement in psoriasis in vivo (Table 1) (63). In this  
372 study, K252a and STS treatment similarly showed 30% increase in 46 kDa (monomeric non-  
373 phosphorylated tau) and 35% decrease at 48 kDa (monomeric p-tau) compared to OA, with DA9  
374 antibody (**Figure 2a, 2b, and Table 3**). K252a treatment caused 40% reduction of 170 kDa (DA9;  
375 oligomeric p-tau) compared to OA treatment alone (average of n=3) (**Figure 2a, 2b, and Table**  
376 **3**). For p-tau detection, probing with CP13 antibody showed 60% and 32% reduction in 110 kDa  
377 (oligomeric p-tau form) with K252a and STS treatment, correspondingly. PHF-1 showed 70% and  
378 80% reduction in levels of 240 kDa (oligomeric form) with K252a and STS treatment, respectively  
379 (**Figure 2a, 2b, Table 3**).  $\alpha$ II-spectrin immunoreactive bands (intact-240 kDa, SBDP150/145, and  
380 SBDP120) did not show a statistically significant difference compared to control values. Although  
381 STS is known to induce apoptosis, the absence of SBDPs is due to the effect of caspase and calpain  
382 inhibitors (S+Z), which in our previous studies have shown to decrease SBDP150/145/120  
383 resulting from STS treatment (64, 65).

#### 384 **CDK5 inhibitor: Roscovitine**

385 Roscovitine is a cyclin-dependent kinase 5 (CDK5) that acts through direct competition at the  
386 ATP-binding site (66). It has been previously shown that tau protein can be a hyperphosphorylated  
387 by CDK5 in specific pathological conditions (67-69). To study the role of CDK5 in our tauopathy  
388 cell-based-model, Roscovitine was selected to assess its effect on OA-induced tau  
389 hyperphosphorylation and oligomerization. Surprisingly, Roscovitine showed an adverse effect by  
390 increasing levels of oligomeric tau detected at 170 kDa (-51%; DA9), 110 kDa (-11%; CP13), and  
391 240 kDa (-53%; PHF-1) compared to OA treatment alone (**Figure 2a, 2b, Table 3**). Roscovitine  
392 showed partial but a statistically non-significant decrease in the 48 kDa (monomeric p-tau) band  
393 of DA9, compared to OA treatment alone. Moreover,  $\alpha$ II-spectrin antibody did not show a

394 statistically significant difference of intact form (240 kDa), SBDP150/145, and SBDP120  
395 compared to control values.  $\beta$ -actin protein levels remained even in all experimental conditions.

396 **Baseline and OA-induced tau hyperphosphorylation and oligomerization: effects of various**  
397 **kinase inhibitors treatments in rat primary cerebrocortical neuronal (CTX) culture.**

398 To further expand our experimental paradigm in a cell-based model suitable for drug candidate  
399 screening, the effectiveness of the protein kinase inhibitors was investigated on rat primary  
400 cerebrocortical neuronal (CTX) cultures. Our CTX primary culture is fully differentiated neurons,  
401 which can provide a model for physiologically relevant cellular events that make neurons uniquely  
402 susceptible to disease-associated proteins. Additionally, the use of high-throughput primary  
403 culture allowed us to screen multiple drug candidates in a short period, compared to conventional  
404 methods and permit the exposure of novel biological concepts to identify new drug targets for  
405 therapeutics. Therefore, CTX cells were pre-treated with or without OA 24h (100 nM) (Table 1)  
406 followed by treatment with protein kinase inhibitors for 6h. Calpain and caspase-3 inhibitors, SNJ-  
407 1945 and Z-DCB respectively, were added to all experimental conditions to prevent cell death-  
408 mediated proteolysis of tau as a potential confound. To monitor neuronal culture health and  
409 metabolism, the samples were probed with  $\alpha$ II-spectrin antibody, and intact form (240 kDa),  
410 SBDP150/145, and SBDP120 were quantified and compared to control.

411 CTX control cultures showed normal cell bodies and healthy neurites, including axons and  
412 dendrites. Notably, untreated control samples showed basal levels of phosphorylated tau (67 kDa)  
413 detected by total and p-tau antibodies, including: DA31 (a.a.150-190), CP13 (pSer202), RZ3  
414 (pThr231), PHF-1 (pSer396/pSer404), AT8 (pSer202/pThr205), and AT270 (pThr205) (**Figure**  
415 **4a, 4b, lane 1**). In agreement with previous reports using immunocytochemistry and western  
416 blotting, rat cortical neurons in primary culture showed that tau is physiologically highly

417 phosphorylated (70). Thus, in our experimental design, various kinase inhibitors were tested on  
418 basal and OA-induced p-tau to measure their effects in reducing physiological and pathological  
419 phosphorylation levels at different epitopes.

420 Treatment with OA for 24h caused a dramatic increase of 67 kDa band (monomeric p-tau) at  
421 multiple phospho-tau epitopes (CP13: 9x, RZ3: 9.8x, PHF-1: 13x, AT8: 3x, and AT270: 10x)  
422 (**Figure 5a, 5b, lane 2**). In contrast to N2a cells, oligomeric forms of tau protein were not observed  
423 when tested with total tau (DA31 and DA9), and phospho-tau antibodies in CTX culture. Since  
424 the samples were prepared under SDS-reducing conditions, it might be possible that tau oligomers  
425 in CTX culture are disrupted, although tau cross-linking by disulfide bonds is not an essential  
426 requirement for tau oligomerization (71).

427 Since the concentration of 30  $\mu$ M TBB resulted in at least 90% inhibition in N2a cells, the same  
428 concentration was used for CTX culture. Treating CTX culture with TBB reduced basal and OA-  
429 induced tau phosphorylation (67 kDa) at CP13 (-OA: 91%, +OA: 98%), RZ3 (-OA: 100%, +OA:  
430 100%), PHF-1 (-OA: 100%, +OA: 100%), AT8 (-OA: 91%, +OA: 100%), and AT270 (-OA:  
431 100%, +OA: 100%) compared to OA treatment alone (**Figure 4a, 4b, lane 7 and Figure 5a, 5b,**  
432 **lane 8, Table 4**). Total tau DA31 (a.a. 150-190) antibody detected immunoreactive bands at 63  
433 kDa and 67 kDa with the different kinase inhibitor treatments. The decreased electrophoretic  
434 mobility of the 63 kDa might correspond to the lower levels of p-tau protein induced by the protein  
435 kinase inhibitors; thus, this band was assigned as non-phospho-tau. TBB treatment caused a  
436 reduction of the phospho-tau band at 67 kDa (-OA: 41%, +OA: 91%), and an increase of non-  
437 phospho tau band at 63 kDa (-OA: +53%, +OA: +81%) (**Figure 4a, 4b, lane 7 and Figure 5a, 5b,**  
438 **lane 8, Table 4**).

439 In contrast to N2a cells, LiCl caused considerable reduction of basal and OA-induced tau  
440 phosphorylation (monomeric p-tau, 67 kDa) in CTX culture at CP13 (-OA: 94%, +OA: 50%), RZ3  
441 (-OA: 89%, +OA: 100%), PHF-1 (-OA: 98%, +OA: 100%), AT8 (-OA: 100%, +OA: 81%), AT270  
442 (-OA: 100%, +OA: 100%) and total tau DA31 (-OA:93%, +OA:96%) (**Figure 4a, 4b, lane 4 and**  
443 **Figure 5a 5b, lane 5, Table 4**). AR also abolished the 67 kDa band with basal and OA-induced  
444 tau hyperphosphorylation (**Figure 4a, 4b, lane 10 and Figure 5a 5b, lane 11, Table 4**). With total  
445 tau DA31 (a.a. 150-190), LiCl and AR completely reduced the 67 kDa (monomeric p-tau) and  
446 substantially increased the 63 kDa band (non-phospho tau). Treating CTX cells with A107 also  
447 showed a substantial inhibition of 67 kDa (-OA and +OA) band with CP13 (-OA: 92%, +OA:  
448 36%), RZ3 (-OA: 79%, +OA: 70%), PHF-1 (-OA: 65%, +OA: 85%), AT8 (-OA: 82%, +OA:  
449 21%), AT270 (-OA: 100%, +OA: 100%), and total tau DA31 (-OA: 80%, +OA: 55%), compared  
450 to OA treatment alone (**Figure 4a, 4b, lane 9 and Figure 5a 5b, lane 10, Table 4**). As for  
451 Roscovitine treatment, in contrast to N2a neuronal treatment, the 67 kDa band was reduced  
452 considerably at CP13 (-OA: 85%, +OA: 63%), RZ3 (-OA: 42%, +OA: 91%), PHF-1 (-OA: 63%,  
453 +OA: 81%), and total tau DA31 (-OA, +OA: ~30%). However, Roscovitine did not show a  
454 statistically significant effect on OA-induced tau phosphorylation at AT8 and AT270 (**Figure 4a,**  
455 **4b, lane 6 and Figure 5a 5b, lane 7, Table 4**).

456 On the other hand, CsA caused a molecular weight shift in the electrophoretic mobility of the 67  
457 kDa to 63 kDa at the sites CP13 (pSer202), RZ3 (pThr231), and DA31 (a.a.102-145), presumably  
458 accounting for the dephosphorylation of tau (Supplementary Figure 3). In reference to the 67 kDa  
459 band, CsA had dramatic inhibition on basal tau phosphorylation at: CP13 (90%), RZ3 (91%), PHF-  
460 1 (89%), AT8 (95%), AT270 (92%) and total tau DA31 (67 kDa, 95%) (**Supplementary Figure**  
461 **3a, b, Table 4**). With OA treatment, CsA also showed a considerable immunoreactivity reduction

462 of 67 kDa band at the epitopes: CP13 (33%), AT8 (86%) and total tau DA31 (28%). CsA had no  
463 effect on 67 kDa band at PHF-1, AT270, and RZ3 compared to OA treatment alone  
464 (**Supplementary Figure 3a, b, Table 4**). Minor oligomeric bands were observed at 240 kDa with  
465 PHF-1 antibody in OA treated samples. Based on the  $\alpha$ II-spectrin blot, CTX cultures demonstrated  
466 intact spectrin (240 kDa) and the absence of any SBDPs, suggesting a healthy metabolism under  
467 the experimental conditions.

468 Furthermore, Saracatinib caused considerable reduction of basal and OA-induced tau  
469 hyperphosphorylation at: CP13 (-OA: 41%, +OA: 100%), RZ3 (-OA: 81%, +OA: 100%), PHF-1  
470 (-OA: 52%, +OA: 100%), AT270 (-OA: 0%, +OA: 84%) and total tau DA31 (-OA: 5%, +OA:  
471 20%). Saracatinib did not show any significant effect at AT8 phospho-tau epitope  
472 (pSer202/pThr205 sites) (**Figure 4a, 4b, lane 8 and Figure 5a, 5b, lane 9; Table 4**).

473 Treatment with K252a caused substantial inhibition of 67 kDa band, with basal and OA-induced  
474 treatments at CP13 (-OA: 35%, +OA: 41%), RZ3 (-OA: 45%, +OA: 37%), PHF-1 (-OA: 61%,  
475 +OA: 63%), and total tau DA31 (-OA: 41%, +OA: 45%) (**Figure 4a, 4b, lane 2, and Figure 5a,**  
476 **5b, lane 3; Table 4**). K252a did not show any statistically significant inhibition at AT8 and AT270  
477 with both basal and OA-induced tau hyperphosphorylation (**Figure 4a, 4b, lane 2; 5a, 5b, lane 3;**  
478 **Table 4**). Cultures treated with STS showed considerable reduction of basal and OA-induced tau  
479 phosphorylation at CP13 (-OA: 86%, +OA: 63%), RZ3 (-OA: 83%, +OA: 81%), PHF-1 (-OA:  
480 55%, +OA: 89%), AT8 (-OA: 88%, +OA: 12%), AT270 (-OA: 100%, +OA: 100%), and total tau  
481 DA31 (-OA: 41%, +OA: 45%) (**Figure 4a, 4b, lane 3a and Figure 5a, 5b, lane 4; Table 4**).

482 Unexpectedly, EGTA caused an adverse effect in CTX culture by further enhancing physiological  
483 p-tau and OA-induced tau hyperphosphorylation at CP13 (-OA: -51%, +OA: -12%), RZ3 (-OA: -  
484 63%, +OA: -22%), PHF-1 (-OA: -22%, +OA: -13%), AT8 (-OA: -64%, +OA: -5%), AT270 (-OA: -

485 68%,+OA:-63%), and total tau DA31 (-OA:-73%,+OA:-69%)(**Figure 4a, 4b, lane 5 and Figure**  
486 **5a, 5b, lane 6; Table 4**).  $\beta$ -actin protein levels remained even in all experimental conditions. When  
487 samples were probed with  $\alpha$ II-spectrin antibody, with the calpain and caspase-3 inhibitors added  
488 (S and Z), SBDP150/145 and SBDP120 bands were statistically non-significant compared to  
489 control, in both basal and OA-induced tau hyperphosphorylation, suggesting a healthy neuronal  
490 culture.

491 Taken all together, treatments with CKII inhibitor TBB, GSK3 inhibitors LiCl and AR, and  
492 Src/Fyn Kinase inhibitor Saracatinib showed robust inhibition leading to different reduced basal  
493 and OA-induced tau phosphorylation profiles demonstrating the specificity of inhibitors tested in  
494 our tauopathy cell-based models. Thus, the kinase inhibitors studied provide targets to reduce or  
495 prevent tau hyperphosphorylation and aggregation in tauopathies.

## 496 **Discussion**

497  
498  
499 In the present study, OA was used to induce tau hyperphosphorylation and oligomerization  
500 in mouse neuroblastoma N2a culture and rat primary cerebrocortical neuronal cultures (CTX) to  
501 screen for various tau kinase inhibitors as potential drug candidates. The N2a neuronal cultures  
502 have been widely used to study mechanisms of neurodegeneration because they are a homogenous  
503 culture system that is convenient to handle and can multiply quickly to produce a tremendous  
504 amount of neuron precursor cells (72). However, the primary cultures were implemented in this  
505 study as they represent a healthier form of cortical neurons as opposed to cell lines which are  
506 cancerous, in a sense that gene expression in primary cortical culture could represent and mimic  
507 the actual *in vivo* expression. Additionally, primary culture has the advantage in portraying the  
508 complexity of the central nervous system by better translating into *in vivo* models used for

509 screening pharmaceutical drug candidate's compounds (73). It has been reported that OA results  
510 in robust tau hyperphosphorylation at multiple pathological epitopes in animal and cell culture  
511 studies (38, 40, 41, 74-76).

512 OA treatment was used to induce tau hyperphosphorylation and oligomerization at various  
513 phospho-tau epitopes in N2a cell culture as a tauopathy model. OA caused down-regulation of  
514 protein phosphatase and showed the appearance of oligomeric forms of p-tau species (110 kDa,  
515 170 kDa, and 240 kDa) immunoreactive to p-tau-specific antibodies (pSer202, pSer396/404) and  
516 total anti-tau (a.a. 102-142). Although the exact mechanism of tauopathy-induced disorders is not  
517 yet elucidated, the immunostaining of autopsy brains with anti-p-tau antibodies, including AT8  
518 (pSer202/pThr205), and PHF-1 (pSer396/pSer404) are utilized as a diagnostic method of AD and  
519 tauopathy (77). Thus, in our study, the increase in tau phosphorylation detected was identified at  
520 these sites as a representation of a tauopathy model.

521 Moreover, among all the phospho-tau epitopes studied here, Thr231 epitope is thought to  
522 be associated in the initiation of tau hyperphosphorylation in tauopathies while other epitopes such  
523 as Thr181, Ser202/Thr205, and Ser396/Ser404 are phosphorylated far ahead during the tauopathy  
524 process and the progression of the disease (78). The phosphorylation sites Thr231 and Thr181 have  
525 been proposed as biomarkers in AD while Ser202/Thr205 are used to determine the stage of AD  
526 progression (79-81). These phosphorylation sites were selected in our study to associate the  
527 effectiveness of protein kinase inhibitors with tauopathy-relevant phosphorylation sites.

528 It is widely established that PP2A is the primary enzyme responsible for dephosphorylation  
529 of tau protein throughout the brain, controlling all tau phosphorylation sites. PP2A activity is  
530 decreased in AD and TBI brains (12, 82). Therefore, the OA-induced inhibition of PP2A is a highly

531 relevant model to study various tau protein kinase inhibitors as modulators of tau  
532 hyperphosphorylation and oligomerization targeting tau pathology (**Figure 6, Table 2**).

533 In contrast to N2a cell culture, the monomeric form of tau (ranging from 63 kDa – 67 kDa)  
534 was only observed in CTX culture. OA might be able to cause tau oligomerization inducing  
535 phosphorylation at different sites on tau depending upon the cell line. One possible reason for such  
536 effect would be that our separation of tau protein by SDS-PAGE was carried out under reducing  
537 conditions (Dithiothreitol (DTT) and  $\beta$ -ME) that could have the ability to minimize tau oligomers  
538 to the monomeric form, specifically in CTX primary culture. Our CTX serum-free neurobasal  
539 media contained antioxidants such as glutathione. Thus, the addition of these antioxidants may  
540 have blocked the process of tau oligomerization from occurring.

541 In the N2a and CTX cell culture, TBB (CKII inhibitor) surprisingly provided the most  
542 profound reversal of tau phosphorylation and oligomerization at the epitopes pSer202, (CP13),  
543 pSer396/pSer404 (PHF-1), pSer202/pThr205 (AT8), pThr181 (AT8), and pThr231 (RZ3). TBB is  
544 a selective, cell-permeable, ATP/GTP-competitive inhibitor of casein kinase II (CKII) ( $IC_{50}$ =900  
545 nM for rat liver) (83). It has been shown that CKII function is aberrant in AD, and its alteration  
546 precedes hyperphosphorylated tau accumulation in NFT formation (18). Moreover, it has been  
547 reported that CKII can phosphorylate tau purified from human brain and neuroblastoma cell line  
548 (18, 83-85). A study has shown that CKII phosphorylates SET, a potent PP2A inhibitor, inducing  
549 tau hyperphosphorylation in neurons and animal models, while inhibition of CKII by TBB  
550 eliminated this event (86). Thus, inhibition of CKII by TBB might provide a pharmacological  
551 interference for treating tauopathy-related disorders.

552 Since GSK-3 is a well-known kinase that can phosphorylate tau *in vitro* and *in vivo* and  
553 has been proposed as a target for pharmacological intervention (87, 88), three GSK-3 small



554 molecule kinase inhibitors (LiCl, AR, and A-107) were selected to be assessed on OA-induced  
555 tauopathy, cell-based model. AR provided robust suppression of tau hyperphosphorylation in CTX  
556 culture at all tau epitopes tested (**Figure 4a, 4b, and Figure 5a, 5b; and Table 4**) and was less  
557 effective in N2a cells (**Figure 2a, 2b, and Table 3**). It was also observed that the effect of AR is  
558 more prominent compared to another GSK3 inhibitor, A-107 in CTX primary culture. This effect  
559 could be attributed, in part, to the high selectivity and specificity of AR to GSK3 $\beta$  (89) compared  
560 to A-107. A-107 display selectivity for both GSK3 $\alpha$  and GSK3 $\beta$  ( $K_i=0.6$  nM for both) (90) thereby  
561 might dilute the effect of inhibition of GSK3 $\beta$ , which is regarded as the critical kinase in AD (88).

562 Similarly, a study has shown that hypothermia-induced tau hyperphosphorylation was  
563 reduced with AR treatment in human neuroblastoma SH-SY5Y 3R-Tau (76). In another study, AR  
564 protected N2a cell culture against apoptosis by inhibition of the phosphatidylinositol-3  
565 kinase/protein kinase B pathway and showed neuroprotective properties against neurotoxicity  
566 caused by the  $\beta$ -amyloid peptide in hippocampal slices (91). The lack of AR effect on N2a culture  
567 might be attributed to differences in cellular mechanisms from CTX culture, mediating OA-  
568 induced tau phosphorylation at multiple levels and different sites.

569 LiCl is well-known to inhibit GSK3 and other kinases (76). In CTX culture, LiCl caused  
570 dramatic inhibition of basal and OA-induced tau hyperphosphorylation at all tested tau epitopes.  
571 Consistent with previous reports, LiCl was shown to reduce tau phosphorylation in cultured cells,  
572 Ex-vivo rat brain slices, and rat brains at different AD-related tau epitopes (58, 76, 89, 92-94).  
573 Unexpectedly, LiCl showed an opposite impact on N2a culture by increasing OA-induced tau  
574 hyperphosphorylation and oligomerization at multiple tested tau epitopes. To the best of our  
575 knowledge, this effect is reported herein for the first time in cell culture. However, there are  
576 biological targets for LiCl that might have resulted in an adverse event. For instance, one

577 hypothesis states that LiCl is a competitive inhibitor of GSK-3 to  $Mg^{2+}$ , but not competitive to the  
578 substrate or ATP. Another theory proposes that LiCl causes potassium deprivation (95).

579         The use of CDK5 inhibitor Roscovitine in CTX culture substantially reduced basal and  
580 OA-induced tau hyperphosphorylation at CP13 (pSer202), RZ3 (pT231, PHF-1(pSer396/pSer404)  
581 and AT270 (pThr181). Roscovitine reduced basal phosphorylation at AT8 (pSer202/pThr205) but  
582 did not affect the OA-induced tau hyperphosphorylation, reflecting its specificity and the  
583 selectivity to our cell models. Similarly, several recent studies revealed that inhibiting CDK5 with  
584 Roscovitine had neuroprotective properties against neurodegenerative conditions caused by  
585 decreasing tau phosphorylation (66, 76, 96). Like LiCl, Roscovitine resulted in opposite effects in  
586 the N2a cells by increasing phosphorylation at CP13 (pSer202) and PHF-1 (pSer396/pSer404).

587         Another protein kinase that has recently received consideration as a pharmaceutical target  
588 is the tyrosine kinase Fyn, which has been linked with the amyloid pathway and tau  
589 phosphorylation through the N-terminal domain in dendrites (16). Saracatinib (also known as  
590 AZD0530) is a small molecular inhibitor that has high potency for Src and Fyn kinases (16, 19-  
591 21). Fyn can physically associate with tau and phosphorylate residues by interacting through its  
592 SH3 domain with SH3-binding domains in tau (**Figure 6**) (97). In our experiments, Saracatinib  
593 reduced both basal and OA-induced tau hyperphosphorylation (67 kDa) in N2a and CTX primary  
594 cultures at the epitopes: CP13 (pSer202), RZ3 (pThr231), PHF-1 (pSer396/pSer404) and AT270  
595 (pThr181). Saracatinib did not affect the pSer202/pThr205 (AT8) site, suggesting that Fyn does  
596 not phosphorylate Thr205 residue in our experimental tauopathy model.

597         Cyclosporine (CsA) or FK506 is an 11 amino acid cyclic non-ribosomal peptide used as  
598 an immunosuppressant. CsA is known to induce neuroprotective properties through inhibiting  
599 specifically enzyme activity by binding to cyclophilin, forming a complex that inhibits calcineurin

600 (PP3) (98) (**Figure 6, Table 2**). Several findings have shown that calcineurin inhibition increases  
601 tau hyperphosphorylation, and cells treated with CsA could induce the process (99, 100). In the  
602 present study, it was found that treatment with CsA alone did not result in any significant increase  
603 in tau levels or tau phosphorylation, which lies in agreement with a study done similarly (101),  
604 and reported complete inhibition of OA-induced tau hyperphosphorylation and oligomerization in  
605 N2a cells at the examined tau epitopes. In CTX culture, CsA produced a lower but still  
606 considerable reduction of OA-induced tau phosphorylation compared to N2a neuronal culture.  
607 These data suggest that PP2A is the main enzyme that regulates tau dephosphorylation in our  
608 culture system rather than PP3 at the tested sites. Moreover, we propose that CsA inhibits PP3 by  
609 blocking its binding to the calcium-dependent calmodulin, required for CaMKII to be active,  
610 thereby decreasing tau hyperphosphorylation (**Figure 6, Table 2**).

## 611 **Conclusions**

612 In this study, OA was used to induce tauopathy in neuroblastoma and differentiated  
613 neuronal culture and screen for various pharmaceutical drug candidates. We provided a side-by-  
614 side comparison of possible drug candidates that are well described in respect to tauopathies such  
615 as Alzheimer's (Saracatinib, LiCl, AR) as well as other prospects which have been minimally  
616 studied in application to potential therapies (TBB and CsA). TBB and CsA warrant further test  
617 design involving an animal model of tauopathy. This is particularly important as recent studies  
618 implicate pre-fibrillar hyperphosphorylated tau as the toxic species in AD, CTE, and other  
619 neurodegenerative diseases, therefore, re-establishing the interest in tau kinase inhibitors  
620 development at putative neurotherapies, which could translate into human clinical trials.

## 621 Limitation and Future Directions

622

623           With the use of peptidomic, it is evident that unique peptides are the main causes of  
624 tauopathies; we hypothesized that after using OA induced tau hyperphosphorylation as a tauopathy  
625 model, different drugs could be tested as neurotherapeutic targets for tauopathies-related disorders.  
626 In one study, different Kinase inhibitors were tested on samples, to model possible therapeutic  
627 drugs. TBB is a novel CKII inhibitor that has not been used for tauopathies and can be an example  
628 for other possible drugs.

629  
630           The idea of targeting specific biomarkers, after Peptidomic screening helped identified  
631 potential kinase inhibitor candidates (AR, TBB, CsA, and Saracatinib) that warrant further test  
632 design. The study would like to further test this protocol on 3R vs 4R human tau cell cultures.  
633 Experiments on CSF and blood samples are being run to make up for the high based evidence on  
634 rodent cultures.

635  
636           Some limitations to the study include the idea that these compound dilutions are arbitrary  
637 or based on references using different cell systems. Treatment is often in the high micromolar  
638 range where compounds acts on more than their primary target. The use of serial dilution and the  
639 generation of an EC50 would have been more appropriate.

640  
641           Furthermore, the technic used is entirely based on western blotting which prohibits its  
642 potential use in higher throughput screens. These systems are highly specific, but a wider variety  
643 of auto-antibody assays, would have provided more accurate results.

644

645 Finally, one constraint to this study remain from a lack of interpretation on why some  
646 compounds respond in basal conditions while other respond in OA-treated conditions. The  
647 discrepancy in response between the N2a cell line and CTX also cautions the interpretation of the  
648 screen. Having a wider variety of samples from different parts of the brain, could have potentially  
649 given more precise evidence toward the study.

650

## 651 **List of Abbreviations**

|                    |                                                                               |
|--------------------|-------------------------------------------------------------------------------|
| <b>(A-1070722)</b> | 1-(7-methoxyquinolin-4-yl)-3-(6-(trifluoromethyl) pyridin-2-yl                |
| <b>AD</b>          | Alzheimer's disease                                                           |
| <b>AR-A014418</b>  | N-(4-methoxybenzyl)-N'-(5-nitro-1,3-thiazol-2-yl) urea                        |
| <b>AZD0530</b>     | Saracatinib                                                                   |
| <b>BCIT/NBT</b>    | 5-bromo-4-chloro- 3-indolyl phosphate                                         |
| <b>CaMKII</b>      | Ca <sup>2+</sup> /calmodulin-dependent protein kinase II                      |
| <b>CDK5</b>        | Cyclin-dependent kinase 5                                                     |
| <b>CK2</b>         | Casein kinase                                                                 |
| <b>CKII</b>        | Casein kinase II                                                              |
| <b>CsA</b>         | Cyclosporin A                                                                 |
| <b>CTE</b>         | Chronic traumatic encephalopathy                                              |
| <b>CTX</b>         | Neuronal cortical cell cultures                                               |
| <b>DTT</b>         | Dithiothreitol                                                                |
| <b>DYRK1A/2</b>    | Dual-specificity tyrosine kinase phosphorylation and regulated<br>kinase-1A/2 |

|                    |                                                                                                                                                                                                                                                                   |
|--------------------|-------------------------------------------------------------------------------------------------------------------------------------------------------------------------------------------------------------------------------------------------------------------|
| <b>EGTA</b>        | Ethylene glycol-bis ( $\beta$ -aminoethyl ether)-N,N,N',N'-tetraacetic acid                                                                                                                                                                                       |
| <b>GSK-3</b>       | Glycogen synthase kinase 3 inhibitors                                                                                                                                                                                                                             |
| <b>HMW</b>         | High Molecular Weight                                                                                                                                                                                                                                             |
| <b>K252a</b>       | Staurosporine analog, non-selective cell permeable Protein Kinase Inhibitor;<br><br>(9S,10R,12R)-2,3,9,10,11,12-Hexahydro-10-hydroxy-9-methyl-1-oxo-9,12-epoxy-1H-diindolo[1,2,3-fg:3',2',1'-kl]pyrrolo[3,4-i][1,6]benzodiazocine-10-carboxylic acid methyl ester |
| <b>LiCl</b>        | Lithium Chloride                                                                                                                                                                                                                                                  |
| <b>LMW-MT</b>      | Low molecular weight monomeric tau                                                                                                                                                                                                                                |
| <b>MLCK</b>        | Myosin light-chain kinase                                                                                                                                                                                                                                         |
| <b>N2A</b>         | Neuroblastoma cell line                                                                                                                                                                                                                                           |
| <b>NFT</b>         | Neurofibrillary tangles                                                                                                                                                                                                                                           |
| <b>NMDAR</b>       | N-methyl-D-aspartate receptors                                                                                                                                                                                                                                    |
| <b>OA</b>          | Okadaic acid                                                                                                                                                                                                                                                      |
| <b>PP1</b>         | Protein Phosphatase 1                                                                                                                                                                                                                                             |
| <b>PP2A</b>        | Protein Phosphatase 2A                                                                                                                                                                                                                                            |
| <b>Roscovitine</b> | (2R)-2-1-butanol                                                                                                                                                                                                                                                  |

|                    |                                                                                                                                                                                         |
|--------------------|-----------------------------------------------------------------------------------------------------------------------------------------------------------------------------------------|
| <b>Saracatinib</b> | N-(5-chloro-1,3-benzodioxol-4-yl)-7-[2-(4-methylpiperazin-1-yl)ethoxy]-5-(tetrahydro-2H-pyran-4-yloxy)quinazolin-4-amine                                                                |
| <b>SBDP</b>        | Spectrin breakdown products                                                                                                                                                             |
| <b>SNJ-1945</b>    | Amphipathic ketoamide                                                                                                                                                                   |
| <b>STS</b>         | Staurosporine; (5S,6R,7R,9R)-6-methoxy-5-methyl-7-(methylamino)-6,7,8,9,15,16-hexahydro-17-oxa-4b,9a,15-triaza-5,9-methanodibenzo[b,h]cyclonona[jkl]cyclopenta[e]-as-indacen-14(5h)-one |
| <b>TBB</b>         | 4,5,6,7-tetrabromobenzotriazole                                                                                                                                                         |
| <b>Z-DCB</b>       | Caspase-3; Z-Asp-2,6-Dichlorobenzoyloxymethyl Ketone                                                                                                                                    |

652 **Declarations**

653 **Availability of data and material**

- 654 • All data generated or analyzed during this study are included in this article (and its  
655 additional files).

656

657 **Competing interests**

- 658 • The authors declare that they have no conflict of interest.

659 **Funding**

660       • This work was supported by funding from the University of Florida Departments of  
661       Emergency Medicine and Psychiatry.

662    **Authors' contributions**

663    Conceived and designed the experiments: HY, KW. Performed the experiments: HY, IT, GA, MK.

664    Analyzed the Data: HY, KW. Contributed reagents/material/analysis tools: ZY, FL, and PD.

665    Performed revision experiments: HY and KW. Wrote the manuscript: HY, MK Reviewed the  
666    manuscript: RY, KW, and FK.

667    **Acknowledgment**

668    We would like to thank Dr. Peter Davies (Albert Einstein College of Medicine, Bronx, NY, USA)  
669    for the kind gift of monoclonal tau antibodies.

670

671

672

673

674

675

676



677

## 678 **References**

- 679 1. Sparks P, Lawrence T, Hinze S. Neuroimaging in the Diagnosis of Chronic Traumatic  
680 Encephalopathy: A Systematic Review. *Clin J Sport Med*. 2017.
- 681 2. Panza F, Imbimbo BP, Lozupone M, Greco A, Seripa D, Logroscino G, et al. Disease-modifying  
682 therapies for tauopathies: agents in the pipeline. *Expert Rev Neurother*. 2019.
- 683 3. Mohamed AZ, Cumming P, Gotz J, Nasrallah F, Department of Defense Alzheimer's Disease  
684 Neuroimaging I. Tauopathy in veterans with long-term posttraumatic stress disorder and traumatic brain  
685 injury. *Eur J Nucl Med Mol Imaging*. 2019;46(5):1139-51.
- 686 4. Wang L, Benzinger TL, Su Y, Christensen J, Friedrichsen K, Aldea P, et al. Evaluation of Tau Imaging  
687 in Staging Alzheimer Disease and Revealing Interactions Between beta-Amyloid and Tauopathy. *JAMA*  
688 *Neurol*. 2016;73(9):1070-7.
- 689 5. Besser LM, Mock C, Teylan MA, Hassenstab J, Kukull WA, Crary JF. Differences in Cognitive  
690 Impairment in Primary Age-Related Tauopathy Versus Alzheimer Disease. *J Neuropathol Exp Neurol*. 2019.
- 691 6. Pir GJ, Choudhary B, Mandelkow E. models of tauopathy. *FASEB J*. 2017;31(12):5137-48.
- 692 7. Perrine K, Helcer J, Tsiouris AJ, Pisapia DJ, Stieg P. The Current Status of Research on Chronic  
693 Traumatic Encephalopathy. *World Neurosurg*. 2017;102:533-44.
- 694 8. Kovacs GG. Tauopathies. *Handb Clin Neurol*. 2017;145:355-68.
- 695 9. Neve RL, Harris P, Kosik KS, Kurnit DM, Donlon TA. Identification of cDNA clones for the human  
696 microtubule-associated protein tau and chromosomal localization of the genes for tau and microtubule-  
697 associated protein 2. *Brain Res*. 1986;387(3):271-80.
- 698 10. Avila J, Jiménez JS, Sayas CL, Bolós M, Zabala JC, Rivas G, et al. Tau Structures. *Front Aging*  
699 *Neurosci*. 2016;8:262.
- 700 11. Lee G, Leugers CJ. Tau and Tauopathies. *Prog Mol Biol Transl Sci*. 2012;107:263-93.
- 701 12. Theendakara V, Bredesen DE, Rao RV. Downregulation of protein phosphatase 2A by  
702 apolipoprotein E: Implications for Alzheimer's disease. *Mol Cell Neurosci*. 2017;83:83-91.
- 703 13. Stoothoff WH, Johnson GV. Tau phosphorylation: physiological and pathological consequences.  
704 *Biochim Biophys Acta*. 2005;1739(2-3):280-97.
- 705 14. Ni R, Ji B, Ono M, Sahara N, Zhang MR, Aoki I, et al. Comparative in-vitro and in-vivo quantifications  
706 of pathological tau deposits and their association with neurodegeneration in tauopathy mouse models. *J*  
707 *Nucl Med*. 2018.
- 708 15. Sahara N, Shimojo M, Ono M, Takuwa H, Febo M, Higuchi M, et al. Tau Imaging for a Diagnostic  
709 Platform of Tauopathy Using the rTg4510 Mouse Line. *Front Neurol*. 2017;8:663.
- 710 16. Nygaard HB. Targeting Fyn Kinase in Alzheimer's Disease. *Biol Psychiatry*. 2018;83(4):369-76.
- 711 17. Martin L, Latypova X, Wilson CM, Magnaudeix A, Perrin ML, Yardin C, et al. Tau protein kinases:  
712 involvement in Alzheimer's disease. *Ageing Res Rev*. 2013;12(1):289-309.
- 713 18. Rosenberger AF, Morrema TH, Gerritsen WH, van Haastert ES, Snkhchyan H, Hilhorst R, et al.  
714 Increased occurrence of protein kinase CK2 in astrocytes in Alzheimer's disease pathology. *J*  
715 *Neuroinflammation*. 2016;13:4.
- 716 19. Li C, Götz J. Somatodendritic accumulation of Tau in Alzheimer's disease is promoted by Fyn-  
717 mediated local protein translation. *EMBO J*. 2017;36(21):3120-38.
- 718 20. Liu W, Zhao J, Lu G. miR-106b inhibits tau phosphorylation at Tyr18 by targeting Fyn in a model of  
719 Alzheimer's disease. *Biochem Biophys Res Commun*. 2016;478(2):852-7.
- 720 21. Kaufman AC, Salazar SV, Haas LT, Yang J, Kostylev MA, Jeng AT, et al. Fyn inhibition rescues  
721 established memory and synapse loss in Alzheimer mice. *Ann Neurol*. 2015;77(6):953-71.

- 722 22. Dolan PJ, Johnson GV. The role of tau kinases in Alzheimer's disease. *Curr Opin Drug Discov Devel.*  
723 2010;13(5):595-603.
- 724 23. Bennett PC, Zhao W, Ng KT. Concentration-dependent effects of protein phosphatase (PP)  
725 inhibitors implicate PP1 and PP2A in different stages of memory formation. *Neurobiol Learn Mem.*  
726 2001;75(1):91-110.
- 727 24. Ando K, Maruko-Otake A, Ohtake Y, Hayashishita M, Sekiya M, Iijima KM. Stabilization of  
728 Microtubule-Unbound Tau via Tau Phosphorylation at Ser262/356 by Par-1/MARK Contributes to  
729 Augmentation of AD-Related Phosphorylation and Abeta42-Induced Tau Toxicity. *PLoS Genet.*  
730 2016;12(3):e1005917.
- 731 25. Gerson JE, Farmer KM, Henson N, Castillo-Carranza DL, Carretero Murillo M, Sengupta U, et al.  
732 Tau oligomers mediate alpha-synuclein toxicity and can be targeted by immunotherapy. *Mol*  
733 *Neurodegener.* 2018;13(1):13.
- 734 26. Tan CC, Zhang XY, Tan L, Yu JT. Tauopathies: Mechanisms and Therapeutic Strategies. *J Alzheimers*  
735 *Dis.* 2018;61(2):487-508.
- 736 27. Wang KK, Yang Z, Zhu T, Shi Y, Rubenstein R, Tyndall JA, et al. An update on diagnostic and  
737 prognostic biomarkers for traumatic brain injury. *Expert Rev Mol Diagn.* 2018;18(2):165-80.
- 738 28. Aldag M, Armstrong RC, Bandak F, Bellgowan PSF, Bentley T, Biggerstaff S, et al. The Biological  
739 Basis of Chronic Traumatic Encephalopathy following Blast Injury: A Literature Review. *J Neurotrauma.*  
740 2017;34(S1):S26-S43.
- 741 29. Panza F, Solfrizzi V, Seripa D, Imbimbo BP, Lozupone M, Santamato A, et al. Tau-based  
742 therapeutics for Alzheimer's disease: active and passive immunotherapy. *Immunotherapy.*  
743 2016;8(9):1119-34.
- 744 30. Tolosa E, Litvan I, Höglinger GU, Burn D, Lees A, Andrés MV, et al. A phase 2 trial of the GSK-3  
745 inhibitor tideglusib in progressive supranuclear palsy. *Mov Disord.* 2014;29(4):470-8.
- 746 31. Georgievska B, Sandin J, Doherty J, Mörtberg A, Neelissen J, Andersson A, et al. AZD1080, a novel  
747 GSK3 inhibitor, rescues synaptic plasticity deficits in rodent brain and exhibits peripheral target  
748 engagement in humans. *J Neurochem.* 2013;125(3):446-56.
- 749 32. Ludolph AC, Kassubek J, Landwehrmeyer BG, Mandelkow E, Mandelkow EM, Burn DJ, et al.  
750 Tauopathies with parkinsonism: clinical spectrum, neuropathologic basis, biological markers, and  
751 treatment options. *Eur J Neurol.* 2009;16(3):297-309.
- 752 33. Medina M. An Overview on the Clinical Development of Tau-Based Therapeutics. *Int J Mol Sci.*  
753 2018;19(4).
- 754 34. Tell V, Hilgeroth A. Recent developments of protein kinase inhibitors as potential AD therapeutics.  
755 *Front Cell Neurosci.* 2013;7:189.
- 756 35. Alonso AD, Di Clerico J, Li B, Corbo CP, Alaniz ME, Grundke-Iqbal I, et al. Phosphorylation of tau at  
757 Thr212, Thr231, and Ser262 combined causes neurodegeneration. *J Biol Chem.* 2010;285(40):30851-60.
- 758 36. Simic G, Babic Leko M, Wray S, Harrington C, Delalle I, Jovanov-Milosevic N, et al. Tau Protein  
759 Hyperphosphorylation and Aggregation in Alzheimer's Disease and Other Tauopathies, and Possible  
760 Neuroprotective Strategies. *Biomolecules.* 2016;6(1):6.
- 761 37. Rabano A, Cuadros R, Merino-Serrais P, Rodal I, Benavides-Piccione R, Gomez E, et al. Protocols  
762 for Monitoring the Development of Tau Pathology in Alzheimer's Disease. *Methods Mol Biol.*  
763 2016;1303:143-60.
- 764 38. Kamat PK, Rai S, Swarnkar S, Shukla R, Ali S, Najmi AK, et al. Okadaic acid-induced Tau  
765 phosphorylation in rat brain: role of NMDA receptor. *Neuroscience.* 2013;238:97-113.
- 766 39. Ho YS, Yang X, Lau JC, Hung CH, Wuwongse S, Zhang Q, et al. Endoplasmic reticulum stress induces  
767 tau pathology and forms a vicious cycle: implication in Alzheimer's disease pathogenesis. *J Alzheimers Dis.*  
768 2012;28(4):839-54.

- 769 40. Jones NC, Nguyen T, Corcoran NM, Velakoulis D, Chen T, Grundy R, et al. Targeting  
770 hyperphosphorylated tau with sodium selenate suppresses seizures in rodent models. *Neurobiol Dis.*  
771 2012;45(3):897-901.
- 772 41. Broetto N, Hansen F, Brolese G, Batassini C, Lirio F, Galland F, et al. Intracerebroventricular  
773 administration of okadaic acid induces hippocampal glucose uptake dysfunction and tau phosphorylation.  
774 *Brain Res Bull.* 2016;124:136-43.
- 775 42. Wang J, Tung YC, Wang Y, Li XT, Iqbal K, Grundke-Iqbal I. Hyperphosphorylation and accumulation  
776 of neurofilament proteins in Alzheimer disease brain and in okadaic acid-treated SY5Y cells. *FEBS Lett.*  
777 2001;507(1):81-7.
- 778 43. Baker S, Gotz J. A local insult of okadaic acid in wild-type mice induces tau phosphorylation and  
779 protein aggregation in anatomically distinct brain regions. *Acta neuropathologica communications.*  
780 2016;4:32.
- 781 44. Boban M, Babic Leko M, Miskic T, Hof PR, Simic G. Human neuroblastoma SH-SY5Y cells treated  
782 with okadaic acid express phosphorylated high molecular weight tau-immunoreactive protein species. *J*  
783 *Neurosci Methods.* 2019;319:60-8.
- 784 45. Shen XY, Luo T, Li S, Ting OY, He F, Xu J, et al. Quercetin inhibits okadaic acid-induced tau protein  
785 hyperphosphorylation through the Ca<sup>2+</sup>-calpain-p25-CDK5 pathway in HT22 cells. *Int J Mol Med.*  
786 2018;41(2):1138-46.
- 787 46. Zhang Z, Simpkins JW. An okadaic acid-induced model of tauopathy and cognitive deficiency. *Brain*  
788 *Res.* 2010;1359:233-46.
- 789 47. Valdiguiesias V, Prego-Faraldo MV, Pasaro E, Mendez J, Laffon B. Okadaic acid: more than a  
790 diarrhetic toxin. *Mar Drugs.* 2013;11(11):4328-49.
- 791 48. Koumura A, Nonaka Y, Hyakkoku K, Oka T, Shimazawa M, Hozumi I, et al. A novel calpain inhibitor,  
792 ((1S)-1((((1S)-1-benzyl-3-cyclopropylamino-2,3-di-oxopropyl)amino)carbonyl)-3-methylbutyl) carbamic  
793 acid 5-methoxy-3-oxapentyl ester, protects neuronal cells from cerebral ischemia-induced damage in  
794 mice. *Neuroscience.* 2008;157(2):309-18.
- 795 49. Drognitz O, Obermaier R, Liu X, Neeff H, von Dobschuetz E, Hopt UT, et al. Effects of organ  
796 preservation, ischemia time and caspase inhibition on apoptosis and microcirculation in rat pancreas  
797 transplantation. *Am J Transplant.* 2004;4(7):1042-50.
- 798 50. Kobeissy FH, Liu MC, Yang Z, Zhang Z, Zheng W, Glushakova O, et al. Degradation of betaII-Spectrin  
799 Protein by Calpain-2 and Caspase-3 Under Neurotoxic and Traumatic Brain Injury Conditions. *Mol*  
800 *Neurobiol.* 2015;52(1):696-709.
- 801 51. Mondello S, Robicsek SA, Gabrielli A, Brophy GM, Papa L, Tepas J, et al.  $\alpha$ II-Spectrin Breakdown  
802 Products (SBDPs): Diagnosis and Outcome in Severe Traumatic Brain Injury Patients. *J Neurotrauma.*  
803 2010;27(7):1203-13.
- 804 52. Khélifa T, Beck WT. Induction of apoptosis by dexrazoxane (ICRF-187) through caspases in the  
805 absence of c-jun expression and c-Jun NH<sub>2</sub>-terminal kinase 1 (JNK1) activation in VM-26-resistant CEM  
806 cells. *Biochem Pharmacol.* 1999;58(8):1247-57.
- 807 53. Iimoto DS, Masliah E, DeTeresa R, Terry RD, Saitoh T. Aberrant casein kinase II in Alzheimer's  
808 disease. *Brain Res.* 1990;507(2):273-80.
- 809 54. Toledo FD, Pérez LM, Basiglio CL, Ochoa JE, Sanchez Pozzi EJ, Roma MG. The Ca<sup>2+</sup>-calmodulin-  
810 Ca<sup>2+</sup>/calmodulin-dependent protein kinase II signaling pathway is involved in oxidative stress-induced  
811 mitochondrial permeability transition and apoptosis in isolated rat hepatocytes. *Arch Toxicol.*  
812 2014;88(9):1695-709.
- 813 55. Iqbal K, Liu F, Gong CX, Grundke-Iqbal I. Tau in Alzheimer Disease and Related Tauopathies. *Curr*  
814 *Alzheimer Res.* 2010;7(8):656-64.
- 815 56. Qin N, Olcese R, Bransby M, Lin T, Birnbaumer L. Ca<sup>2+</sup>-induced inhibition of the cardiac Ca<sup>2+</sup>-  
816 channel depends on calmodulin. *Proc Natl Acad Sci U S A.* 1999;96(5):2435-8.

- 817 57. Song JS, Yang SD. Tau protein kinase I/GSK-3 beta/kinase FA in heparin phosphorylates tau on  
818 Ser199, Thr231, Ser235, Ser262, Ser369, and Ser400 sites phosphorylated in Alzheimer disease brain. *J*  
819 *Protein Chem.* 1995;14(2):95-105.
- 820 58. Noble W, Planel E, Zehr C, Olm V, Meyerson J, Suleman F, et al. Inhibition of glycogen synthase  
821 kinase-3 by lithium correlates with reduced tauopathy and degeneration in vivo. *Proc Natl Acad Sci U S A.*  
822 2005;102(19):6990-5.
- 823 59. Prabhakaran J, Zanderigo F, Solingapuram Sai KK, Rubin-Falcone H, Jorgensen MJ, Kaplan JR, et al.  
824 Radiosynthesis and in Vivo Evaluation of [<sup>11</sup>C]A1070722, a High Affinity GSK-3 PET Tracer in Primate Brain.  
825 *ACS Chem Neurosci.* 2017;8(8):1697-703.
- 826 60. Gucaip A, Sparano JA, Caravelli J, Santamauro J, Patil S, Abbruzzi A, et al. Phase II trial of saracatinib  
827 (AZD0530), an oral SRC-inhibitor for the treatment of patients with hormone receptor-negative metastatic  
828 breast cancer. *Clin Breast Cancer.* 2011;11(5):306-11.
- 829 61. Tapley P, Lamballe F, Barbacid M. K252a is a selective inhibitor of the tyrosine protein kinase  
830 activity of the trk family of oncogenes and neurotrophin receptors. *Oncogene.* 1992;7(2):371-81.
- 831 62. Zimmermann A, Keller H. Effects of staurosporine, K 252a and other structurally related protein  
832 kinase inhibitors on shape and locomotion of Walker carcinosarcoma cells. *Br J Cancer.* 1992;66(6):1077-  
833 82.
- 834 63. Ruegg UT, Burgess GM. Staurosporine, K-252 and UCN-01: potent but nonspecific inhibitors of  
835 protein kinases. *Trends in pharmacological sciences.* 1989;10(6):218-20.
- 836 64. Liu MC, Kobeissy F, Zheng W, Zhang Z, Hayes RL, Wang KK. Dual vulnerability of tau to calpains  
837 and caspase-3 proteolysis under neurotoxic and neurodegenerative conditions. *ASN Neuro.*  
838 2011;3(1):e00051.
- 839 65. Wang KK, Yang Z, Chiu A, Lin F, Rubenstein R. Examining the Neural and Astroglial Protective  
840 Effects of Cellular Prion Protein Expression and Cell Death Protease Inhibition in Mouse Cerebrocortical  
841 Mixed Cultures. *Mol Neurobiol.* 2016;53(7):4821-32.
- 842 66. Meijer L, Borgne A, Mulner O, Chong JP, Blow JJ, Inagaki N, et al. Biochemical and cellular effects  
843 of roscovitine, a potent and selective inhibitor of the cyclin-dependent kinases cdc2, cdk2 and cdk5.  
844 *European journal of biochemistry.* 1997;243(1-2):527-36.
- 845 67. Bhounsule AS, Bhatt LK, Prabhavalkar KS, Oza M. Cyclin dependent kinase 5: A novel avenue for  
846 Alzheimer's disease. *Brain Res Bull.* 2017;132:28-38.
- 847 68. Engmann O, Giese KP. Crosstalk between Cdk5 and GSK3β: Implications for Alzheimer's Disease.  
848 *Frontiers in Molecular Neuroscience.* 2009;2:2.
- 849 69. Sengupta A, Grundke-Iqbal I, Iqbal K. Regulation of phosphorylation of tau by protein kinases in  
850 rat brain. *Neurochem Res.* 2006;31(12):1473-80.
- 851 70. Davis DR, Brion JP, Couck AM, Gallo JM, Hanger DP, Ladhani K, et al. The phosphorylation state of  
852 the microtubule-associated protein tau as affected by glutamate, colchicine and beta-amyloid in primary  
853 rat cortical neuronal cultures. *Biochem J.* 1995;309 ( Pt 3):941-9.
- 854 71. Sahara N, DeTure M, Ren Y, Ebrahim AS, Kang D, Knight J, et al. Characteristics of TBS-extractable  
855 hyperphosphorylated tau species: aggregation intermediates in rTg4510 mouse brain. *J Alzheimers Dis.*  
856 2013;33(1):249-63.
- 857 72. Chen Y, Wang C, Hu M, Pan J, Chen J, Duan P, et al. Effects of ginkgolide A on okadaic acid-induced  
858 tau hyperphosphorylation and the PI3K-Akt signaling pathway in N2a cells. *Planta Med.* 2012;78(12):1337-  
859 41.
- 860 73. Schlachetzki JC, Saliba SW, Oliveira AC. Studying neurodegenerative diseases in culture models.  
861 *Rev Bras Psiquiatr.* 2013;35 Suppl 2:S92-100.
- 862 74. Zhao L, Xiao Y, Wang XL, Pei J, Guan ZZ. Original Research: Influence of okadaic acid on  
863 hyperphosphorylation of tau and nicotinic acetylcholine receptors in primary neurons. *Exp Biol Med*  
864 (Maywood). 2016;241(16):1825-33.

- 865 75. Hübinger G, Geis S, LeCorre S, Mühlbacher S, Gordon S, Fracasso RP, et al. Inhibition of PHF-like  
866 tau hyperphosphorylation in SH-SY5Y cells and rat brain slices by K252a. *J Alzheimers Dis.* 2008;13(3):281-  
867 94.
- 868 76. Bretteville A, Marcouiller F, Julien C, El Khoury NB, Petry FR, Poitras I, et al. Hypothermia-induced  
869 hyperphosphorylation: a new model to study tau kinase inhibitors. *Sci Rep.* 2012;2:480.
- 870 77. Kimura T, Sharma G, Ishiguro K, Hisanaga SI. Phospho-Tau Bar Code: Analysis of Phosphoisotypes  
871 of Tau and Its Application to Tauopathy. *Front Neurosci.* 2018;12:44.
- 872 78. Augustinack JC, Schneider A, Mandelkow EM, Hyman BT. Specific tau phosphorylation sites  
873 correlate with severity of neuronal cytopathology in Alzheimer's disease. *Acta Neuropathol.*  
874 2002;103(1):26-35.
- 875 79. Hampel H, Buerger K, Zinkowski R, Teipel SJ, Goernitz A, Andreasen N, et al. Measurement of  
876 phosphorylated tau epitopes in the differential diagnosis of Alzheimer disease: a comparative  
877 cerebrospinal fluid study. *Arch Gen Psychiatry.* 2004;61(1):95-102.
- 878 80. Hampel H, Goernitz A, Buerger K. Advances in the development of biomarkers for Alzheimer's  
879 disease: from CSF total tau and Abeta(1-42) proteins to phosphorylated tau protein. *Brain Res Bull.*  
880 2003;61(3):243-53.
- 881 81. Buerger K, Teipel SJ, Zinkowski R, Blennow K, Arai H, Engel R, et al. CSF tau protein phosphorylated  
882 at threonine 231 correlates with cognitive decline in MCI subjects. *Neurology.* 2002;59(4):627-9.
- 883 82. Lucke-Wold BP, Turner RC, Logsdon AF, Bailes JE, Huber JD, Rosen CL. Linking traumatic brain  
884 injury to chronic traumatic encephalopathy: identification of potential mechanisms leading to  
885 neurofibrillary tangle development. *J Neurotrauma.* 2014;31(13):1129-38.
- 886 83. Sarno S, Papinutto E, Franchin C, Bain J, Elliott M, Meggio F, et al. ATP site-directed inhibitors of  
887 protein kinase CK2: an update. *Curr Top Med Chem.* 2011;11(11):1340-51.
- 888 84. Avila J, Ulloa L, González J, Moreno F, Díaz-Nido J. Phosphorylation of microtubule-associated  
889 proteins by protein kinase CK2 in neuritogenesis. *Cell Mol Biol Res.* 1994;40(5-6):573-9.
- 890 85. Greenwood JA, Scott CW, Spreen RC, Caputo CB, Johnson GV. Casein kinase II preferentially  
891 phosphorylates human tau isoforms containing an amino-terminal insert. Identification of threonine 39  
892 as the primary phosphate acceptor. *J Biol Chem.* 1994;269(6):4373-80.
- 893 86. Zhang Q, Xia Y, Wang Y, Shentu Y, Zeng K, Mahaman YAR, et al. CK2 Phosphorylating I2(PP2A)/SET  
894 Mediates Tau Pathology and Cognitive Impairment. *Front Mol Neurosci.* 2018;11:146.
- 895 87. Medina M, Garrido JJ, Wandosell FG. Modulation of GSK-3 as a Therapeutic Strategy on Tau  
896 Pathologies. *Front Mol Neurosci.* 2011;4:24.
- 897 88. Llorens-Martin M, Jurado J, Hernandez F, Avila J. GSK-3beta, a pivotal kinase in Alzheimer disease.  
898 *Front Mol Neurosci.* 2014;7:46.
- 899 89. Gould TD, Einat H, Bhat R, Manji HK. AR-A014418, a selective GSK-3 inhibitor, produces  
900 antidepressant-like effects in the forced swim test. *Int J Neuropsychopharmacol.* 2004;7(4):387-90.
- 901 90. Prabhakaran J, Zanderigo F, Sai KKS, Rubin-Falcone H, Jorgensen MJ, Kaplan JR, et al.  
902 Radiosynthesis and in Vivo Evaluation of [ACS Chem Neurosci. 2017;8(8):1697-703.
- 903 91. Bhat R, Xue Y, Berg S, Hellberg S, Ormo M, Nilsson Y, et al. Structural insights and biological effects  
904 of glycogen synthase kinase 3-specific inhibitor AR-A014418. *J Biol Chem.* 2003;278(46):45937-45.
- 905 92. Orena SJ, Torchia AJ, Garofalo RS. Inhibition of glycogen-synthase kinase 3 stimulates glycogen  
906 synthase and glucose transport by distinct mechanisms in 3T3-L1 adipocytes. *J Biol Chem.*  
907 2000;275(21):15765-72.
- 908 93. Fu ZQ, Yang Y, Song J, Jiang Q, Lin ZC, Wang Q, et al. LiCl attenuates thapsigargin-induced tau  
909 hyperphosphorylation by inhibiting GSK-3beta in vivo and in vitro. *J Alzheimers Dis.* 2010;21(4):1107-17.
- 910 94. Lee S, Shea TB. Regulation of tau proteolysis by phosphatases. *Brain Res.* 2013;1495:30-6.
- 911 95. Kramer T, Schmidt B, Lo Monte F. Small-Molecule Inhibitors of GSK-3: Structural Insights and Their  
912 Application to Alzheimer's Disease Models. *Int J Alzheimers Dis.* 2012;2012:381029.

- 913 96. Liu J, Yang J, Xu Y, Guo G, Cai L, Wu H, et al. Roscovitine, a CDK5 Inhibitor, Alleviates Sevoflurane-  
914 Induced Cognitive Dysfunction via Regulation Tau/GSK3beta and ERK/PPARgamma/CREB Signaling. *Cell*  
915 *Physiol Biochem.* 2017;44(2):423-35.
- 916 97. Polanco JC, Li C, Bodea LG, Martinez-Marmol R, Meunier FA, Gotz J. Amyloid-beta and tau  
917 complexity - towards improved biomarkers and targeted therapies. *Nat Rev Neurol.* 2018;14(1):22-39.
- 918 98. Liu J, Farmer JD, Jr., Lane WS, Friedman J, Weissman I, Schreiber SL. Calcineurin is a common  
919 target of cyclophilin-cyclosporin A and FKBP-FK506 complexes. *Cell.* 1991;66(4):807-15.
- 920 99. Wang Q, Wang J. Injection of bradykinin or cyclosporine A to hippocampus induces Alzheimer-like  
921 phosphorylation of Tau and abnormal behavior in rats. *Chin Med J (Engl).* 2002;115(6):884-7.
- 922 100. Yu DY, Luo J, Bu F, Song GJ, Zhang LQ, Wei Q. Inhibition of calcineurin by infusion of CsA causes  
923 hyperphosphorylation of tau and is accompanied by abnormal behavior in mice. *Biol Chem.*  
924 2006;387(7):977-83.
- 925 101. Gong CX, Lidsky T, Wegiel J, Zuck L, Grundke-Iqbal I, Iqbal K. Phosphorylation of microtubule-  
926 associated protein tau is regulated by protein phosphatase 2A in mammalian brain. Implications for  
927 neurofibrillary degeneration in Alzheimer's disease. *J Biol Chem.* 2000;275(8):5535-44.
- 928 102. Bialojan C, Takai A. Inhibitory effect of a marine-sponge toxin, okadaic acid, on protein  
929 phosphatases. Specificity and kinetics. *Biochem J.* 1988;256(1):283-90.
- 930 103. Swingle M, Ni L, Honkanen RE. Small-molecule inhibitors of ser/thr protein phosphatases:  
931 specificity, use and common forms of abuse. *Methods Mol Biol.* 2007;365:23-38.
- 932 104. Amundsen R, Asberg A, Ohm IK, Christensen H. Cyclosporine A- and tacrolimus-mediated  
933 inhibition of CYP3A4 and CYP3A5 in vitro. *Drug Metab Dispos.* 2012;40(4):655-61.
- 934 105. Serkova N, Brand A, Christians U, Leibfritz D. Evaluation of the effects of immunosuppressants on  
935 neuronal and glial cells in vitro by multinuclear magnetic resonance spectroscopy. *Biochim Biophys Acta.*  
936 1996;1314(1-2):93-104.
- 937 106. Zhang F, Phiel CJ, Spece L, Gurvich N, Klein PS. Inhibitory phosphorylation of glycogen synthase  
938 kinase-3 (GSK-3) in response to lithium. Evidence for autoregulation of GSK-3. *J Biol Chem.*  
939 2003;278(35):33067-77.
- 940 107. Ryves WJ, Harwood AJ. Lithium inhibits glycogen synthase kinase-3 by competition for  
941 magnesium. *Biochem Biophys Res Commun.* 2001;280(3):720-5.
- 942 108. Kase H, Iwahashi K, Nakanishi S, Matsuda Y, Yamada K, Takahashi M, et al. K-252 compounds,  
943 novel and potent inhibitors of protein kinase C and cyclic nucleotide-dependent protein kinases. *Biochem*  
944 *Biophys Res Commun.* 1987;142(2):436-40.
- 945 109. Thuret G, Chiquet C, Herrag S, Dumollard JM, Boudard D, Bednarz J, et al. Mechanisms of  
946 staurosporine induced apoptosis in a human corneal endothelial cell line. *Br J Ophthalmol.*  
947 2003;87(3):346-52.
- 948 110. Green TP, Fennell M, Whittaker R, Curwen J, Jacobs V, Allen J, et al. Preclinical anticancer activity  
949 of the potent, oral Src inhibitor AZD0530. *Molecular oncology.* 2009;3(3):248-61.
- 950 111. Rubenstein R, Sharma DR, Chang B, Oumata N, Cam M, Vaucelle L, et al. Novel Mouse Tauopathy  
951 Model for Repetitive Mild Traumatic Brain Injury: Evaluation of Long-Term Effects on Cognition and  
952 Biomarker Levels After Therapeutic Inhibition of Tau Phosphorylation. *Front Neurol.* 2019;10:124.
- 953 112. Zhao Z, Wang L, Volk AG, Birch NW, Stoltz KL, Bartom ET, et al. Regulation of MLL/COMPASS  
954 stability through its proteolytic cleavage by caspase-1 as a possible approach for clinical therapy of  
955 leukemia. *Genes Dev.* 2019;33(1-2):61-74.
- 956 113. Segura-Egea JJ, Jimenez-Rubio A, Rios-Santos JV, Velasco-Ortega E, Calvo-Gutierrez JR. In vitro  
957 inhibitory effect of EGTA on macrophage adhesion: endodontic implications. *Journal of endodontics.*  
958 2003;29(3):211-3.
- 959 114. Knaryan VH, Samantaray S, Park S, Azuma M, Inoue J, Banik NL. SNJ-1945, a calpain inhibitor,  
960 protects SH-SY5Y cells against MPP(+) and rotenone. *J Neurochem.* 2014;130(2):280-90.

961 115. Henzing AJ, Dodson H, Reid JM, Kaufmann SH, Baxter RL, Earnshaw WC. Synthesis of novel caspase  
962 inhibitors for characterization of the active caspase proteome in vitro and in vivo. *J Med Chem.*  
963 2006;49(26):7636-45.  
964 116. Chopra P, Gupta S, Dastidar SG, Ray A. Development of cell death-based method for the selectivity  
965 screening of caspase-1 inhibitors. *Cytotechnology.* 2009;60(1-3):77.

966

967

968

969

970

971

972

973

974

975

976

977

978

979

980

981

982

983

984

985

986

987

988 **Figures. legends**

989 **Figure 1. OA induced tau hyperphosphorylation and oligomerization at different time points**  
990 **in mouse neuroblastoma N2a cells.**

991 (a). Immunoblots of N2a cells extracted protein (20  $\mu$ g) using total and phospho-tau antibodies:  
992 DA9 (a.a. 102-140), CP13 (pSer202), and PHF-1 (pSer396/pSer404).  $\alpha$ II-Spectrin antibody was  
993 used to assess neuronal apoptotic pathway activation through monitoring intact spectrin (240 kDa),  
994 SBDP150/145 (calpain activation), and SBDP120 (caspase-3 activation). Different tau species are  
995 pointed with colored arrows. Blue arrows present monomeric p-tau (48 kDa), and oligomeric p-  
996 tau (110 kDa, 170 kDa, and 240 kDa). Red arrows on PHF-1 points on two minor bands of  
997 oligomeric p-tau (220 kDa and 260 kDa). Black arrows show non-phospho tau band (46 kDa).  
998 SNJ-1945 (abbreviated as S; a calpain inhibitor, 100  $\mu$ M) and Z-DCB (abbreviated as Z; a caspase-  
999 3 inhibitor, 60  $\mu$ M) were added for all experimental conditions for 1h before the treatment with  
1000 OA (100 nM) for 6h or 24h, to prevent apoptosis-mediated proteolysis of tau and  $\alpha$ II-Spectrin. A  
1001 reverse time course followed OA treatment, and all cells were collected at the same time and  
1002 conditions. (b). Immunoblots quantification. All data are normalized to  $\beta$ -actin and are expressed  
1003 as a percentage of control. Data are presented as  $\pm$  SEM for n=3. Statistical analysis was performed  
1004 with one-way ANOVA. For multiple comparisons, one-way ANOVA followed by the  
1005 Bonferroni's post-hoc test was performed. \*p<0.05, \*\*p<0.01, \*\*\*p<0.001, \*\*\*\*p<0.0001 and  
1006 ns: non-significant. Full-length blots are presented in (**Supplementary Figure 4**).

1007 **Figure 2. Screening of protein kinase inhibitors on OA-induced Tau hyperphosphorylation**  
1008 **and oligomerization in N2a cells.**



1009 (a). Immunoblots of N2a cells extracted protein (20  $\mu$ g) using phospho-tau antibodies (CP13, PHF-  
1010 1), total tau (DA9), and  $\alpha$ II-Spectrin.  $\alpha$ II-Spectrin was probed to assess neuronal cell injury  
1011 monitored with SBDP145/150 and SBDP120. Kinase inhibitors effect on OA-induced tau bands  
1012 (100 nM) was monitored by evaluating the levels of monomeric (48 kDa) and oligomeric p-tau  
1013 immunoreactivity (110 kDa, 170 kDa, and 240 kDa; blue arrows), total tau, and non-phospho tau  
1014 (46 kDa; black arrows). Phosphorylated tau break-down products are shown with PHF-1  
1015 immunoblot. For all experimental conditions, S (a calpain inhibitor) and Z (a caspase-3 inhibitor)  
1016 were added for 1h to before the addition of OA for 24h followed by 6h incubation with the kinase  
1017 inhibitors. The concentrations used for each protein kinase inhibitor are mentioned in materials  
1018 and methods, cell treatment section.  $\beta$ -actin was probed as a loading control. All experimental  
1019 conditions were collected and analyzed at the same time. (b). Immunoblots quantification. All data  
1020 are normalized to  $\beta$ -actin and are expressed as a percentage of control. Data are presented as  $\pm$   
1021 SEM for n=3. Statistical analysis was performed with one-way ANOVA. For multiple  
1022 comparisons, one-way ANOVA followed by the Bonferroni's post-hoc test was performed.  
1023 \*p<0.05, \*\*p<0.01, \*\*\*p<0.001, \*\*\*\*p<0.0001 and ns: non-significant. Full-length blots are  
1024 presented in (Supplementary Figure 5).

1025 **Figure 3. Dose-response of TBB on OA-induced tau hyperphosphorylation and**  
1026 **oligomerization in N2a cells.**

1027 N2a cells were pre-treated with OA for 24h followed by treatment with different concentrations of  
1028 TBB for 6h, as indicated in the figure. (a) Immunoblots of cell extracted proteins using phospho-  
1029 tau antibodies, including CP13 (pSer202), and total tau DA9 (a.a. 102-140). Blue arrows represent  
1030 monomeric and oligomeric p-tau (48 kDa, 110 kDa, and 170 kDa).  $\alpha$ II-Spectrin antibody used to  
1031 monitor SBDPs with the increasing concentrations of TBB. The  $\beta$ -actin antibody was used as a

1032 loading control. All conditions included SNJ-1945 (calpain inhibitor) and Z-DCB (caspase  
1033 inhibitor). (b) TBB dose-response treatment line chart. TBB concentration (in micromolar) is  
1034 shown on the X-axis, and the inhibition percentage is presented on the Y-axis. The control sample  
1035 values were designated as the standard response. The X-axis concentration values are logarithm-  
1036 transformed to fit a straight line. The half maximal inhibitory concentration (IC<sub>50</sub>) was used to  
1037 measure the effectiveness of TBB in inhibiting OA-induced tau hyperphosphorylation and  
1038 oligomerization. GraphPad Prism was used to calculate the IC<sub>50</sub> (for DA9 and CP13 antibodies)  
1039 and are presented in the figure. The statistical analysis was performed with one-way ANOVA,  
1040 followed by Bonferroni's post-hoc test. \*p<0.05, \*\*p<0.01, \*\*\*p<0.001. Data are presented as ±  
1041 SEM for n=3. Full-length blots are presented in (**Supplementary Figure 6**).

1042 **Figure 4. Screening of protein kinase inhibitors on physiologically phosphorylated tau in rat**  
1043 **primary cerebrocortical neuronal culture.**

1044 Rat primary cerebrocortical neuronal differentiated cultures (CTX) at 15 DIVs, were treated  
1045 various protein kinases inhibitors, including K252a (30 μM), STS (20 μM), LiCl (10 μM), EGTA  
1046 (5 mM), Roscovitine (60 μM), Saracatinib (100 μM), TBB (30 μM) and A-107 (20 μM), AR (60  
1047 μM) for 6h. Calpain and caspase inhibitors (S+Z) were added to all experimental conditions for 1h  
1048 before the protein kinase inhibitor treatments. Cell lysates were analyzed on western blots using  
1049 twenty micrograms of protein. (a) Immunoblots of cell lysates analyzed for phosphorylated tau at  
1050 the epitopes CP13 (pSer202), PHF-1 (pSer396/404), AT8 (pSer202/pThr205), RZ3 (pThr231),  
1051 and AT270 (pThr181). Total tau was probed with DA31 (a.a. 150-190) antibody. DA31 blot  
1052 showed two distinctive tau bands (63 kDa, non-phospho tau and 67 kDa, p-tau) following kinase  
1053 inhibitors treatment. SBDP145/150 and SBDP120 were analyzed with the αII-spectrin antibody.  
1054 Different lanes are numbered at the top of each label in the figure. (b) Immunoblot quantification

1055 of basal tau phosphorylation. Ratios of phospho-epitope levels over  $\beta$ -actin  $\pm$  SD are represented  
1056 as a percentage. Statistical analysis was performed with one-way ANOVA. For multiple  
1057 comparisons, one-way ANOVA followed by the Bonferroni's post-hoc test was performed.  
1058 \* $p < 0.05$ , \*\* $p < 0.01$ , \*\*\* $p < 0.001$  and \*\*\*\* $p < 0.0001$ .  $n=3$  per condition. Full-length blots are  
1059 presented in (Supplementary Figure 7).

1060 **Figure 5. Effect of protein kinase inhibitors on OA-induced tau hyperphosphorylation in rat**  
1061 **primary cerebrocortical neuronal culture.**

1062 Rat primary cerebrocortical neuronal differentiated cultures (CTX) at 15 DIV were treated with  
1063 OA (100 nM) for 24h followed by protein kinases inhibitors for 6h. The concentrations of kinase  
1064 inhibitors are the same as the ones mentioned in **Figure 4**. CTX cultures were treated with S and  
1065 Z for 1h before any treatment to prevent apoptotic pathway-mediated tau proteolysis. (a).  
1066 Immunoblots of cell lysates analyzed for phosphorylated tau at the epitopes CP13, PHF-1, AT8,  
1067 RZ3, AT270. Total tau was probed with DA31 antibody. With DA31 blot, the 63 kDa band is  
1068 referred to as monomeric non-phospho tau and the 67 kDa as monomeric p-tau species. Spectrin  
1069 Break down products (SBDPs) were monitored with the  $\alpha$ II-spectrin antibody. (b) Immunoblot  
1070 quantification of OA-induced tau phosphorylation. Ratios of phospho-epitope levels over  $\beta$ -actin  
1071  $\pm$  SD are represented as a percentage. Statistical analysis was performed with one-way ANOVA.  
1072 For multiple comparisons, one-way ANOVA followed by the Bonferroni's post hoc test was  
1073 performed. \* $p < 0.05$ , \*\* $p < 0.01$ , \*\*\* $p < 0.001$  and \*\*\*\* $p < 0.0001$ .  $n=3$  per condition. Full-length  
1074 blots are presented in (Supplementary Figure 8).

1075 **Figure 6. The tauopathy-model and a proposed mechanism for various protein kinase**  
1076 **inhibitors intervention.**

1077 Dephosphorylated tau protein binds the microtubules to maintain it in the polymerized state.  
1078 Phosphorylation of tau protein by a host of different kinases causes tau to dissociate from the  
1079 microtubules. Dissociation of tau causes the microtubules to depolymerize. Specific phosphatases  
1080 dephosphorylate tau allowing the microtubule to re-polymerize again, a physiological process that  
1081 provides structure and shape to the cytoskeleton of neurons. In tauopathies, imbalances between  
1082 kinases and phosphatases functions lead to tau hyperphosphorylation at particular pathological  
1083 sites and a higher tendency to dissociate from the microtubules producing soluble tau aggregates  
1084 and insoluble paired helical filaments (PHF), that could combine to form neurofibrillary tangles  
1085 (NFT). NFT is known to be the toxic species in AD and CTE, including other tauopathy diseases  
1086 and little is known about their active mechanism of neurodegeneration. OA inhibits the function  
1087 of crucial tau phosphatases, (PP1 and PP2A) leading to activation of tau kinases and tau  
1088 hyperphosphorylation initiating the pathological processes of tauopathies. One pharmaceutical  
1089 approach to reverse the mechanism of tauopathies is kinase inhibition. The protein kinase  
1090 inhibitors selected in this study are indicated on this figure. The inhibitors highlighted in blue are  
1091 ones that showed a promising effect on our OA-induced cell-based tauopathy model. Microsoft  
1092 PowerPoint was used to create the artwork.

1093 **Supplementary Figure 1: Effect of cyclosporin A on OA-induced tau hyperphosphorylation**  
1094 **in mouse N2a cells.**

1095 The same experimental design mentioned in **Figure 2** was used to test CsA in N2a cell culture.  
1096 Twenty micrograms of protein extract were used for the analysis of tau. Calpain and caspase-3  
1097 inhibitors (S+Z) were added to all experimental conditions, including the control samples. CsA is  
1098 known to inhibit the phosphatase activity of calcineurin (PP3). In the presented experiment, it is  
1099 used to assess its kinase inhibition potential on the monomeric and oligomeric p-tau induced by

1100 OA. (a). Immunoblots of N2a neuronal culture protein extracts showing antibodies directed against  
1101 major tau phosphorylation sites. Two additional p-tau antibodies were used (AT270 and RZ3) to  
1102 assess the phosphorylation sites at pThr181 and pThr231, respectively. RZ3 and AT270 detected  
1103 distinctive monomeric p-tau bands at 48 kDa, and 55 kDa, respectively. Total tau levels were  
1104 probed using DA9 (a.a. 102-145) in N2a cells. Blue colored labels correspond to monomeric or  
1105 oligomeric p-tau species. Immunoblots were probed with  $\alpha$ II-spectrin antibody to monitor calpain  
1106 and caspase-3 mediated proteolysis. (b). Immunoblots quantification of N2a. The ratio of  
1107 phosphorylation epitopes levels over  $\beta$ -actin levels  $\pm$  SD are represented as a percentage of control.  
1108 n=3 per condition. For multiple comparisons, one-way ANOVA followed by the Bonferroni's  
1109 post-hoc test was performed. \*p<0.05, \*\*p<0.01, \*\*\*p<0.001, \*\*\*\*p<0.0001, ns: non-significant.

1110

1111 **Supplementary Figure 2. Effect of additional two GSK-3 protein kinase inhibitors on OA-**  
1112 **induced tau hyperphosphorylation and oligomerization in N2a cells (with cell-death linked**  
1113 **protease inhibitors (calpain/caspase inhibitors)).**

1114 A continuation of Figure 2 experiment is presented to include two other potent GSK-3 kinase  
1115 inhibitors, AR and A-107. The detailed experimental treatments are as described in materials and  
1116 methods. (a). Immunoblots of N2a cells extracted protein using p-tau antibodies (CP13 and PHF-  
1117 1), total tau (DA9), and  $\alpha$ II-Spectrin.  $\alpha$ II-Spectrin was probed to assess cell apoptosis monitored  
1118 SBDP150/145 kDa and SBDP120 kDa. Kinase inhibition of phosphorylation and oligomerization  
1119 was monitored by evaluating the levels of p-tau antibodies and total tau (blue arrows) and non-  
1120 phospho tau (black arrows). For all conditions, S+Z were added for 1h before the treatments. (b).  
1121 Immunoblots quantification and statistical analysis. All data are normalized to  $\beta$ -actin and are  
1122 expressed as a percentage of control. Data are presented as  $\pm$  SEM for n=3. Statistical analysis was

1123 performed with one-way ANOVA. For multiple comparisons, one-way ANOVA followed by the  
1124 Bonferroni's post-hoc test was performed. \* $p < 0.05$ , \*\* $p < 0.01$ , \*\*\* $p < 0.001$ , \*\*\*\* $p < 0.0001$  and  
1125 ns: non-significant.

1126 **Supplementary Figure 3. Cyclosporin A inhibits physiological and OA-induced Tau**  
1127 **hyperphosphorylation in rat primary cerebrocortical neuronal culture.**

1128 The experimental procedures were followed as described in **Figure 4** and **Figure 5** legends.  
1129 Primary neuronal cultures (CTX) were fully differentiated and had healthy neurites when  
1130 examined under the microscope. All wells were pretreated with S+Z for 1h. For conditions that  
1131 did not include OA, cultures were treated with CsA for 6h. For OA-induced conditions, OA was  
1132 added for 24h followed by CsA for 6h. A reverse time course was followed, and all experimental  
1133 conditions were collected and analyzed at the same time. Twenty micrograms of CTX culture  
1134 extracts were run on SDS-PAGE followed by western blotting. (a). Immunoblots of CTX culture  
1135 protein extracts. CTX culture using antibodies directed against major tau phosphorylation sites  
1136 including: CP13 (pSer202), PHF-1 (pSer396/pSer404), RZ3 (pThr231), AT8 (pSer202/pThr205),  
1137 AT270 (pThr181). Total tau levels were probed using DA31 (a.a. 102-145). The 67 kDa assigned  
1138 as monomeric p-tau band and the 63 kDa band was assigned as monomeric non-phospho tau at the  
1139 different studied epitopes. (b). Immunoblots quantification. The ratio of phosphorylation epitopes  
1140 levels over  $\beta$ -actin levels  $\pm$  SD are represented as a percentage of control.  $n=3$  per condition. For  
1141 multiple comparisons, one-way ANOVA followed by the Bonferroni's post-hoc test was  
1142 performed. \* $p < 0.05$ , \*\* $p < 0.01$ , \*\*\* $p < 0.001$ , \*\*\*\* $p < 0.0001$ , ns: non-significant.

1143 **Supplementary Figure 4. Full scanned immunoblots for Figure 1a.**

1144 **Supplementary Figure 5. Full scanned immunoblots for Figure 2a.**

1145 **Supplementary Figure 6. Full scanned immunoblots for Figure 3a.**

1146 **Supplementary Figure 7. Full scanned immunoblots for Figure 4a.**

1147 **Supplementary Figure 8. Full scanned immunoblots for Figure 5a.**

1148 **Table 1. Phosphatase, Kinase inhibitor and other pharmacological agents used in the study.**

1149 **Table 2. Antibodies used in this study.**

1150 **Table 3. Composite effects of kinase inhibitors on OA-induced Tau hyperphosphorylation in**

1151 **N2a cells.**

1152 **Table 4. Composite effects of kinase inhibitors on basal and OA-induced Tau**

1153 **hyperphosphorylation in rat primary cerebrocortical neuronal cells.**

1154

1155

1156

1157

1158

1159

1160

1161

1162

1163

1164

1165

1166

1167

1168

**Table 1. Phosphatase, Kinase inhibitor and other pharmacological agents used in the study**

| Agent                         | Full Name / Function                                                                                                         | Target                                                      | Affinity in vitro (Ki) | Cross- reactivities                                                                                      | IC <sub>50</sub> (cell-based assay) |
|-------------------------------|------------------------------------------------------------------------------------------------------------------------------|-------------------------------------------------------------|------------------------|----------------------------------------------------------------------------------------------------------|-------------------------------------|
| <b>Phosphatase Inhibitors</b> |                                                                                                                              |                                                             |                        |                                                                                                          |                                     |
| <b>OA</b>                     | Okadaic Acid, Serine/Threonine phosphatase activity                                                                          | PP1, PP2A inhibitor                                         | 150 nM, 32 pM (102)    | -----                                                                                                    | 0.1 μM(103)                         |
| <b>CsA</b>                    | Cyclosporin A/calcium dependent protein phosphatase - immunosuppressant                                                      | Calcineurin (PP3)                                           | 0.98 μM(104)           | FK-506                                                                                                   | 55 μM(105)                          |
| <b>Kinase Inhibitors</b>      |                                                                                                                              |                                                             |                        |                                                                                                          |                                     |
| <b>LiCl</b>                   | Lithium Chloride – acts by competing for magnesium.                                                                          | GSK3β                                                       | 1-2 mM(106)            | -----                                                                                                    | 1-2 mM(107)                         |
| <b>AR-A014418</b>             | N-(4-methoxybenzyl)-N'-(5-nitro-1,3-thiazol-2-yl) urea, antidepressant. Inhibits in an ATP competitive manner                | GSK3β                                                       | 38 nM(91)              | -----                                                                                                    | 104±27 nM (91)                      |
| <b>A-1070722</b>              | 1-(7-methoxyquinolin-4-yl)-3-(6-(trifluoromethyl) pyridin-2-yl) urea Brain penetrant. Inhibits in an ATP competitive manner. | GSK-3α and GSK-3β                                           | 0.6 nM(59)             | -----                                                                                                    | 35-66 nM(90)                        |
| <b>K252a</b>                  | Staurosporine analog, non-selective cell permeable Protein Kinase Inhibitor                                                  | PKA, PKC, PKG, CaMK, and phosphorylase kinase, and others   | 1.8-20 nM(108)         | Broad kinase inhibitor                                                                                   | 1.3-3 μM(63)                        |
| <b>STS</b>                    | Staurosporine, highly non-selective cell permeable Protein Kinase Inhibitor                                                  | Pan Protein Kinase Inhibitor                                | 3-15 nM                | Broad kinase inhibitor                                                                                   | 0.5 μM(109)                         |
| <b>AZD0530</b>                | Saracatinib, anti-invasive and anti-tumor activities                                                                         | Src/Fyn Tyrosine Kinase inhibitor                           | 5-10 nM(21)            | Brc-Abl tyrosine kinase                                                                                  | 1- 10 μM(110)                       |
| <b>Roscovitine</b>            | Seliciclib, competes for the ATP binding sites, apoptotic and antineoplastic activity                                        | CDK5/P35 inhibitor                                          | 0.2 μM(66)             | Pyridoxal Kinase (non-protein target)                                                                    | 10 μM (111)                         |
| <b>TBB</b>                    | 4,5,6,7-tetrabromobenzotriazole, Acts in an ATP/GTP-competitive manner by binding to the Val66 residue of casein kinase-2.   | CKII inhibitor                                              | 80-210 nM(112)         | -----                                                                                                    | 10 μM (from the present study)      |
| <b>Calcium Chelators</b>      |                                                                                                                              |                                                             |                        |                                                                                                          |                                     |
| <b>EGTA</b>                   | ethylene glycol-bis (β-aminoethyl ether)-N, N, N', N'-tetraacetic acid, chelator of divalent cations.                        | divalent ion chelator (Ca <sup>2+</sup> /Mg <sup>2+</sup> ) | 10 nM(113)             | Tyr kinase (500 nM)                                                                                      | 2-5 mM(113)                         |
| <b>Other Inhibitors</b>       |                                                                                                                              |                                                             |                        |                                                                                                          |                                     |
| <b>SNJ-1945</b>               | Amphipathic ketoamide – neuroprotective cell-permeable calpain inhibitor                                                     | Calpain 1, 2 inhibitors                                     | 100 nM(114)            | -----                                                                                                    | 20-30 μM(114)                       |
| <b>Z-DCB</b>                  | Z-Asp-2,6-Dichlorobenzoyloxymethyl Ketone, Inactivates the interleukin-1β-converting enzyme                                  | Pan-Caspase inhibitor                                       | 1-10 μM(115)           | Inhibit the production of cytokines in human peripheral blood mononuclear cells and T cell proliferation | 20-50 μM(116)                       |

1169

1170



| <b>Table 2. Antibodies used in this study</b> |                 |                                                              |                 |
|-----------------------------------------------|-----------------|--------------------------------------------------------------|-----------------|
| <b>Clone name</b>                             | <b>Epitope*</b> | <b>Supplier (Catalog#)</b>                                   | <b>MAb/ PAb</b> |
| <b>Phospho Tau antibodies</b>                 |                 |                                                              |                 |
| AT8                                           | pSer202/pThr205 | Fisher-Thermo (MN1020)                                       | Mouse MAb       |
| AT270                                         | pThr181         | Fisher-Thermo (MN1050)                                       | Mouse MAb       |
| RZ3                                           | pThr231         | Peter Davies, Albert Einstein College of Medicine, Bronx, NY | Mouse Mab       |
| CP13                                          | pSer202         | Peter Davies, Albert Einstein College of Medicine, Bronx, NY | Mouse MAb       |
| PHF-1                                         | pSer396/pSer404 | Peter Davies, Albert Einstein College of Medicine, Bronx, NY | Mouse Mab       |
| <b>Total Tau Antibodies</b>                   |                 |                                                              |                 |
| DA9                                           | aa102-140       | Peter Davies, Albert Einstein College of Medicine, Bronx, NY | Mouse Mab       |
| DA31                                          | aa150-190       | Peter Davies, Albert Einstein College of Medicine, Bronx, NY | Mouse Mab       |
| *Epitope based on human Tau-441 sequence.     |                 |                                                              |                 |

1171

1172

1173

1174

1175

1176

1177

1178

1179

1180

1181

1182

1183

1184

1185

| <b>Table 3. Composite effects of kinase inhibitors on OA-induced Tau hyperphosphorylation in N2a cells.</b> |                     |                    |                  |
|-------------------------------------------------------------------------------------------------------------|---------------------|--------------------|------------------|
| <b>Inhibitor</b>                                                                                            | <b>Inhibition %</b> |                    |                  |
|                                                                                                             | CP13<br>(110 kDa)   | PHF-1<br>(240 kDa) | DA9<br>(170 kDa) |
| K252a                                                                                                       | 62                  | 70                 | 40               |
| STS                                                                                                         | 32                  | 82                 | -10              |
| LiCl                                                                                                        | -14                 | -9                 | -12              |
| EGTA                                                                                                        | 90                  | 85                 | 55               |
| CsA                                                                                                         | 98                  | 90                 | <b>100</b>       |
| Roscovitine                                                                                                 | -11                 | -53                | -22              |
| <b>TBB</b>                                                                                                  | <b>100</b>          | <b>100</b>         | <b>100</b>       |
| Saracatinib                                                                                                 | 70.5                | 46                 | 45               |
| A107                                                                                                        | 23                  | 0                  | 13               |
| AR                                                                                                          | 0                   | 0                  | 36               |

1186 A negative sign correspond to an adverse effect. Bold corresponds to maximal inhibition at the tested  
1187 epitope.

1188

1189

1190

1191

1192

1193

1194

1195

1196

1197

1198

1199

| Inhibitor   |      | Inhibition % |            |            |            |            |            |
|-------------|------|--------------|------------|------------|------------|------------|------------|
|             |      | CP13         | RZ3        | PHF-1      | AT8        | AT270      | DA31       |
| K252a       | - OA | 35           | 45         | 61         | 10         | 17         | 41         |
|             | + OA | 41           | 37         | 63         | 0          | 0          | 45         |
| STS         | - OA | 86           | 83         | 55         | 88         | <b>100</b> | 79         |
|             | + OA | 63           | 81         | 89         | 12         | <b>100</b> | 77         |
| LiCl        | - OA | 94           | 89         | 98         | <b>100</b> | <b>100</b> | 93         |
|             | + OA | 50           | 100        | 100        | 81         | <b>100</b> | 96         |
| EGTA        | - OA | -51          | -63        | -22        | -64        | -68        | -73        |
|             | + OA | -12          | -22        | -13        | -5         | -63        | -69        |
| Roscovitine | - OA | 85           | 42         | 63         | 91         | <b>100</b> | 32         |
|             | + OA | 63           | 91         | 81         | 0          | 18         | 29         |
| TBB         | - OA | 91           | <b>100</b> | <b>100</b> | 91         | <b>100</b> | 41         |
|             | + OA | 98           | <b>100</b> | <b>100</b> | <b>100</b> | <b>100</b> | 91         |
| Saracatinib | - OA | 41           | 81         | 52         | 0          | 0          | 5          |
|             | + OA | <b>100</b>   | <b>100</b> | <b>100</b> | 0          | 84         | 20         |
| A-107       | - OA | 92           | 79         | 65         | 82         | <b>100</b> | 80         |
|             | + OA | 36           | 70         | 85         | 21         | <b>100</b> | 55         |
| AR          | - OA | <b>100</b>   | 89         | <b>100</b> | <b>100</b> | <b>100</b> | <b>100</b> |
|             | + OA | 89           | <b>100</b> | <b>100</b> | <b>100</b> | <b>100</b> | <b>100</b> |
| CsA         | - OA | 90           | 91         | 89         | 95         | 92         | 95         |
|             | + OA | 33           | 26         | 0          | 86         | 11         | 28         |

1200 A negative sign correspond to an adverse effect. Bold corresponds to maximal inhibition at the tested  
 1201 epitope. The -/+ OA indicates either the presence or absence of okadaic acid compound. The  
 1202 densitometric intensity of 67 kDa band from **Figure 4** and **Figure 5** was used for calculating the  
 1203 percentage of inhibition.  
 1204

1205

**Figure 1** 6 hours 24 hours

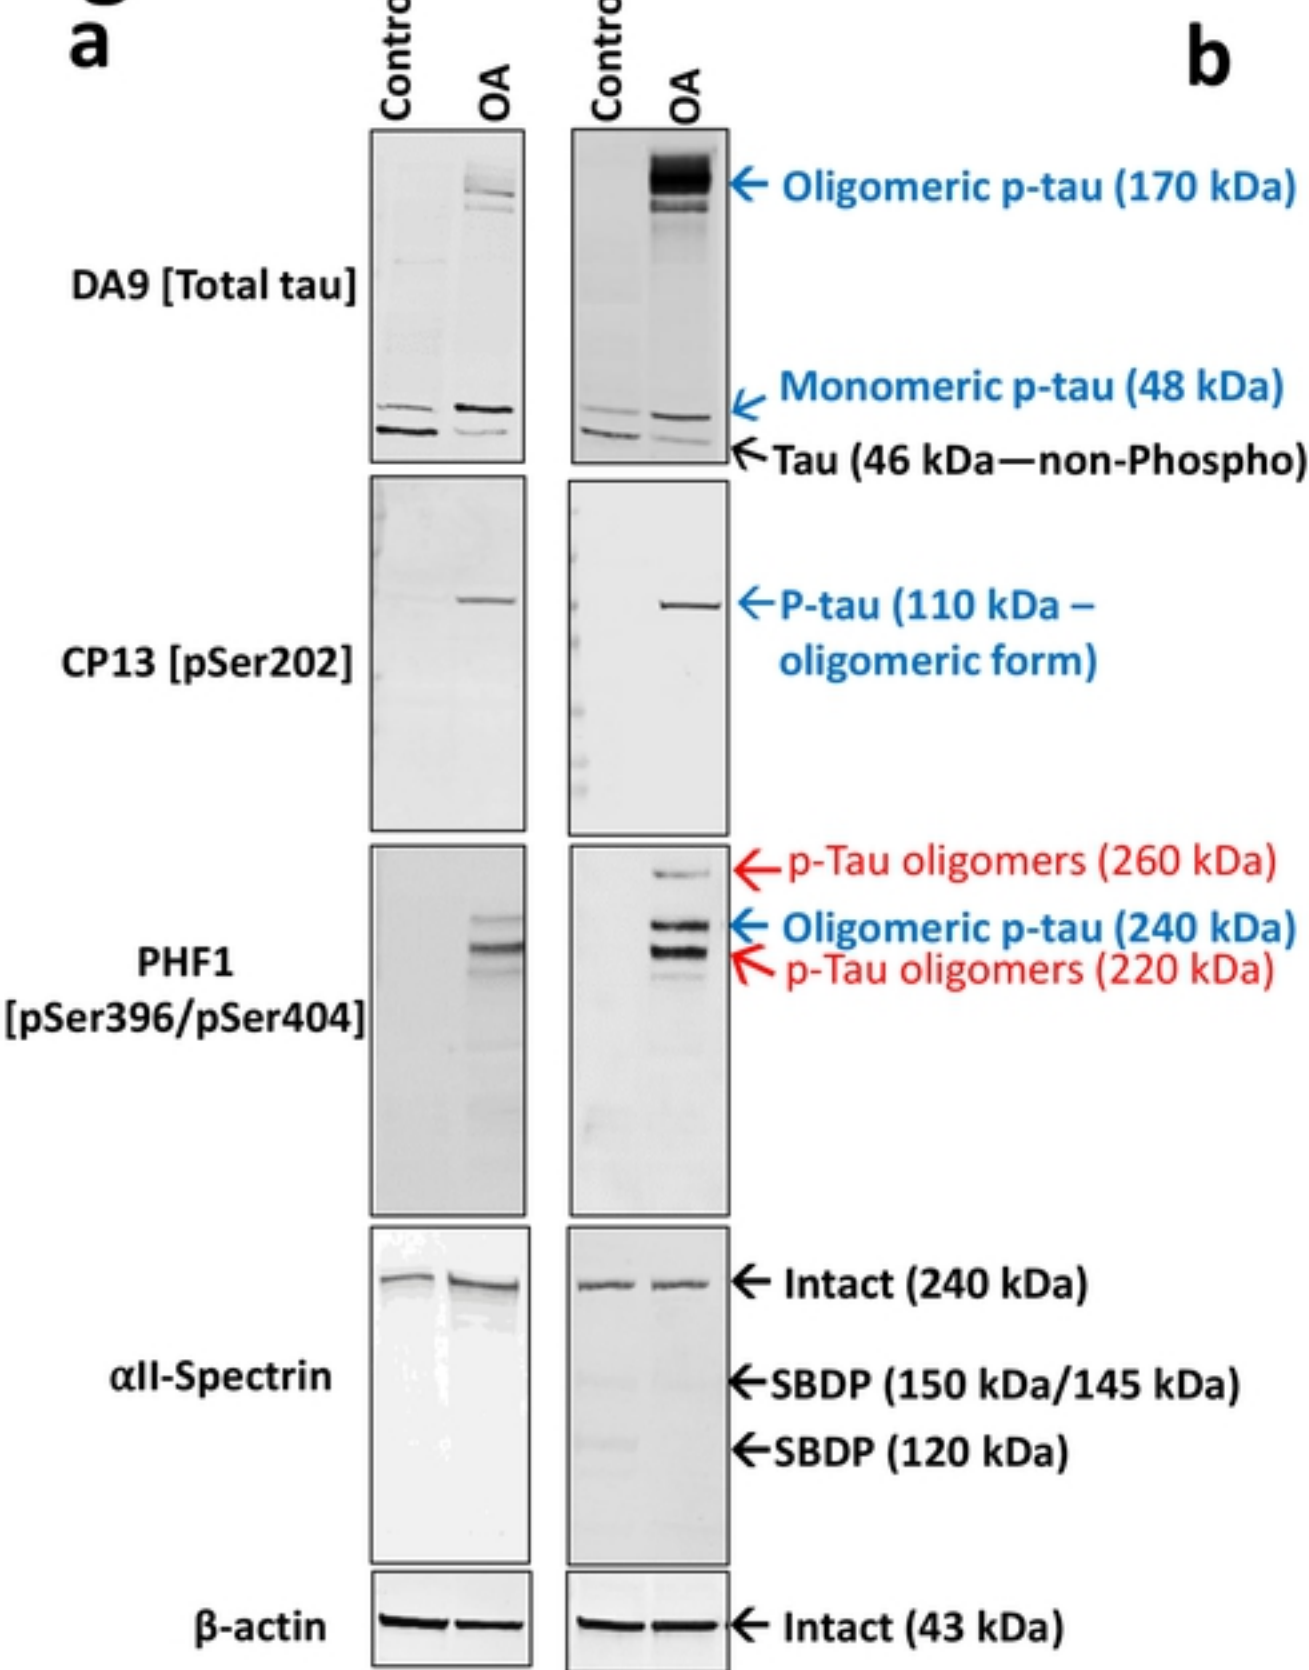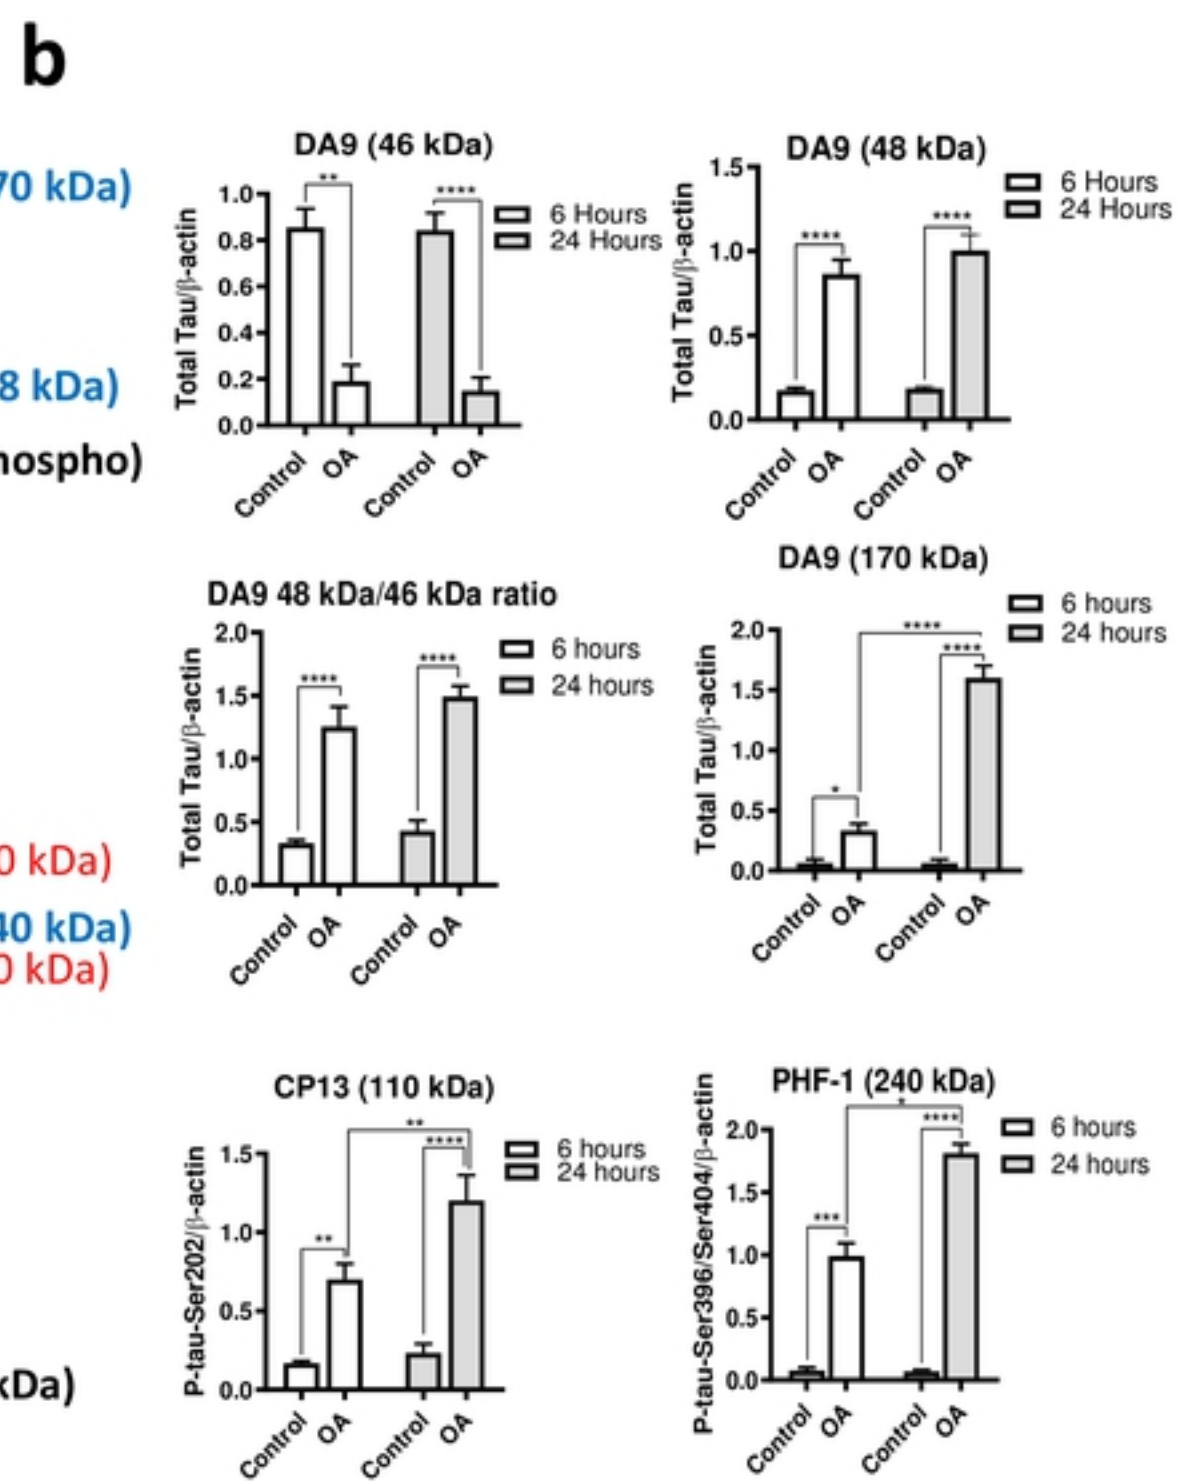



# Figure 2

**b**

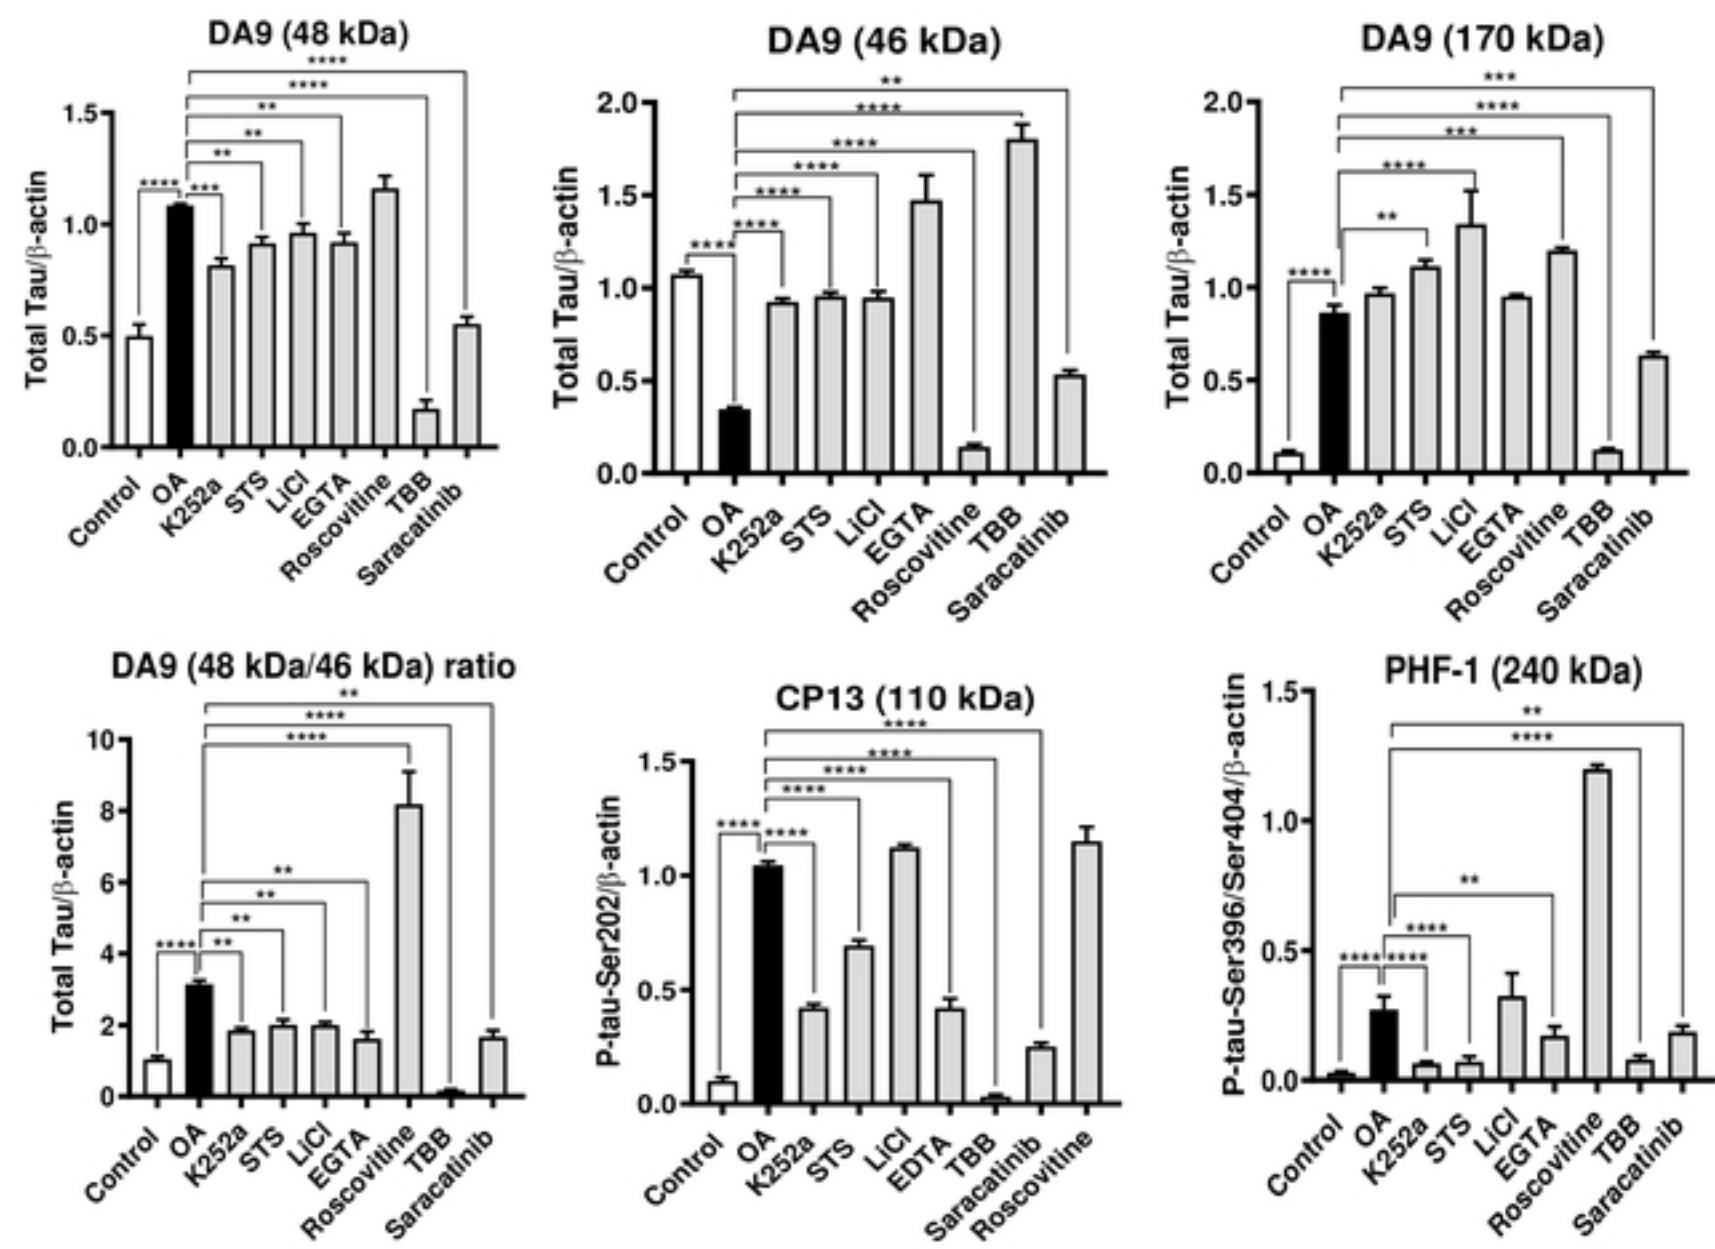

# Figure 3

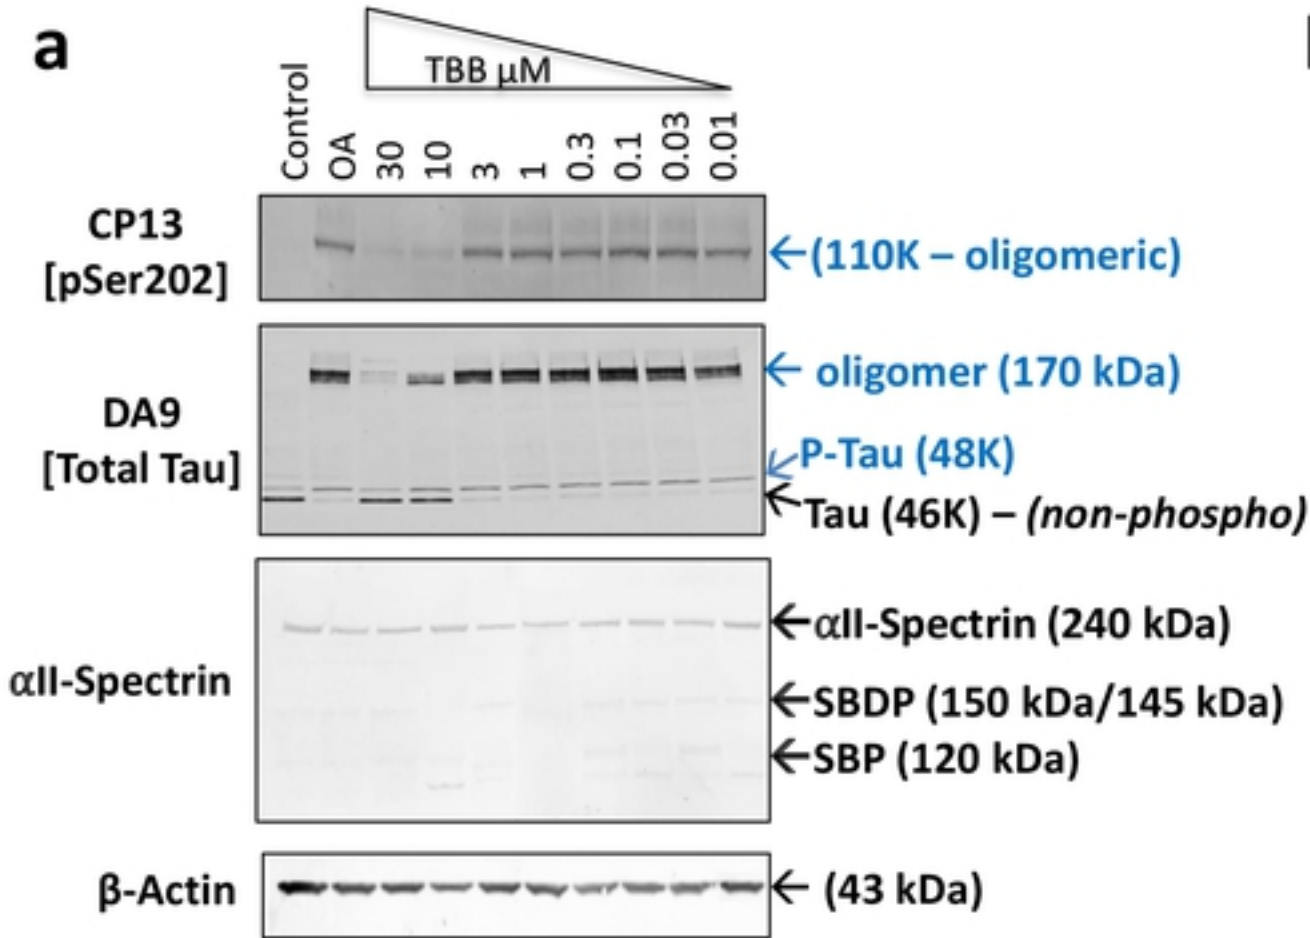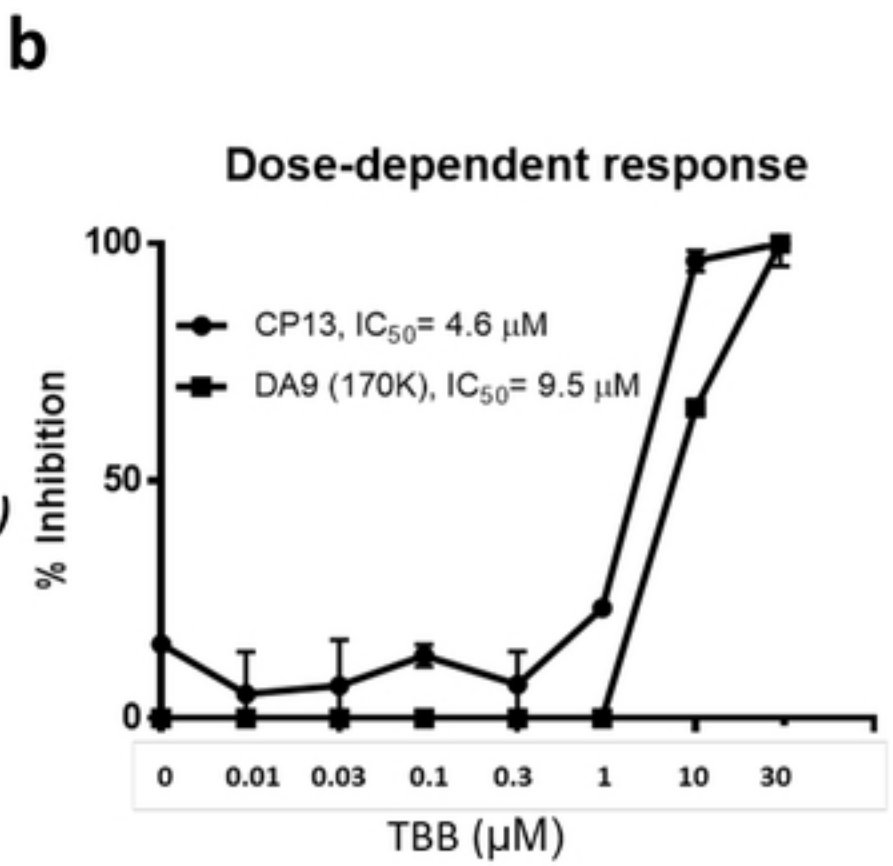





**Figure 4**

CP13 (67 kDa)

RZ3 (67 kDa)

PHF-1 (67 kDa)

**b**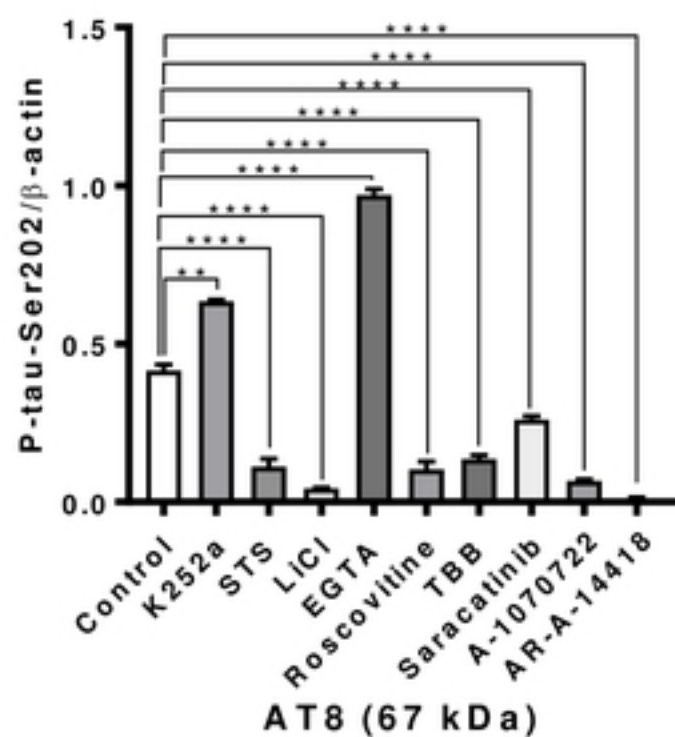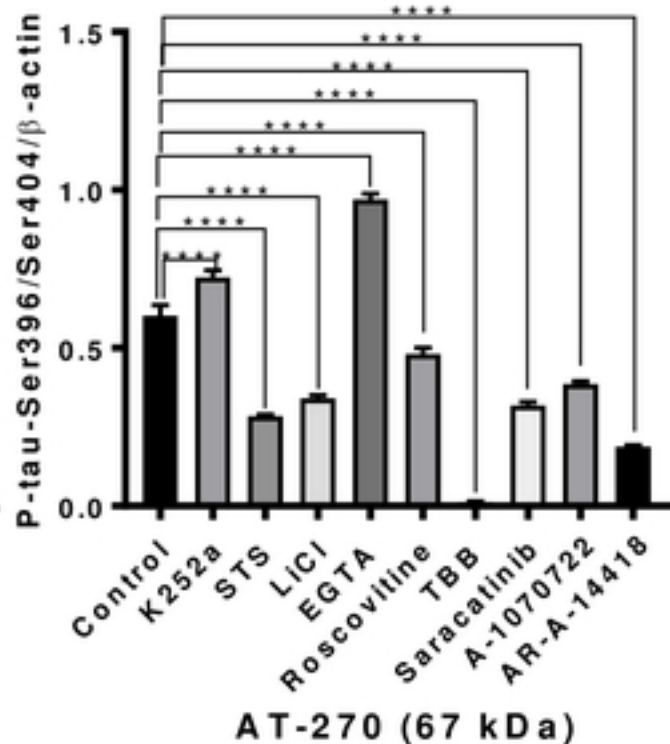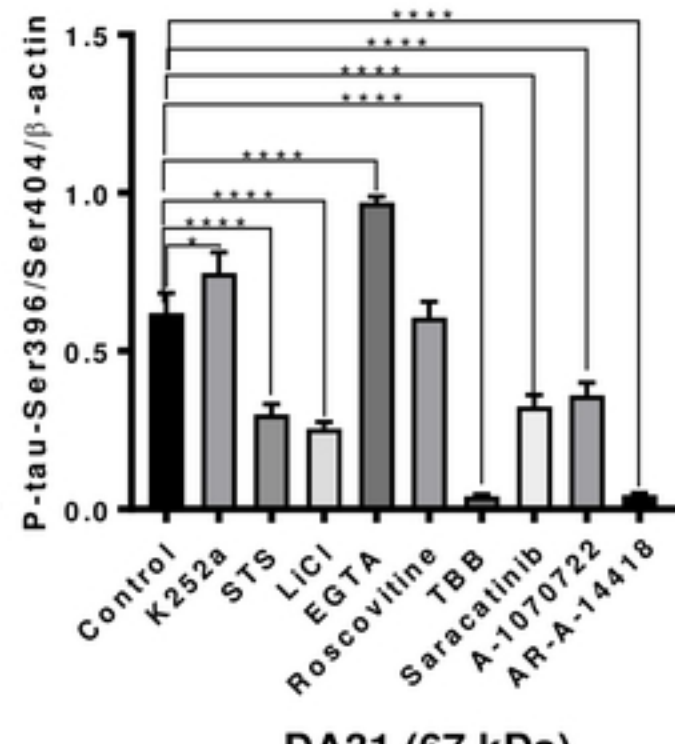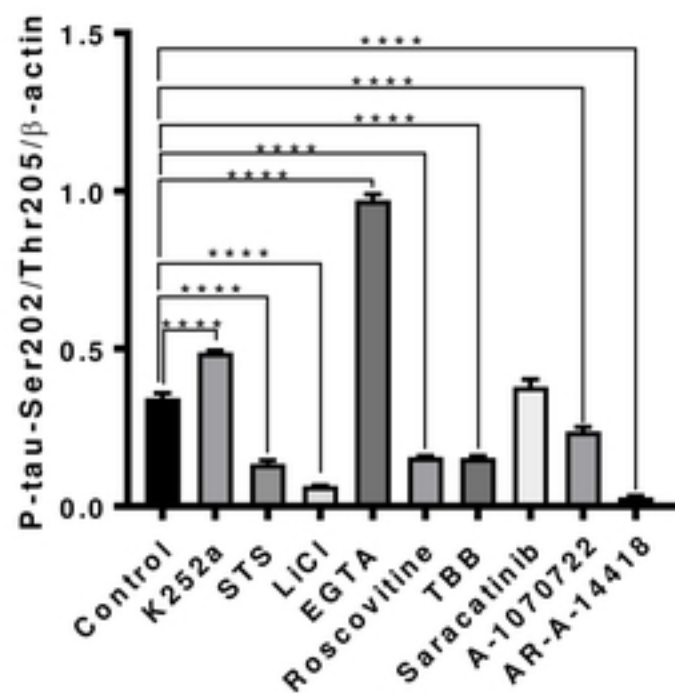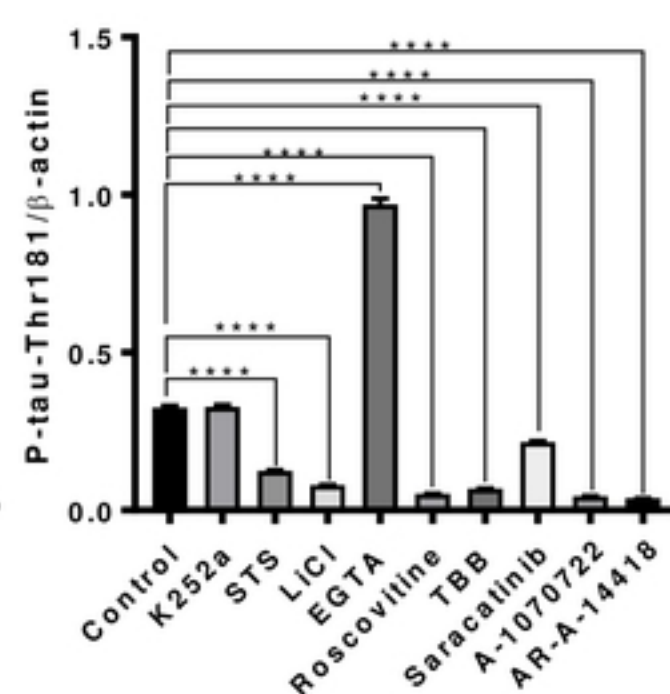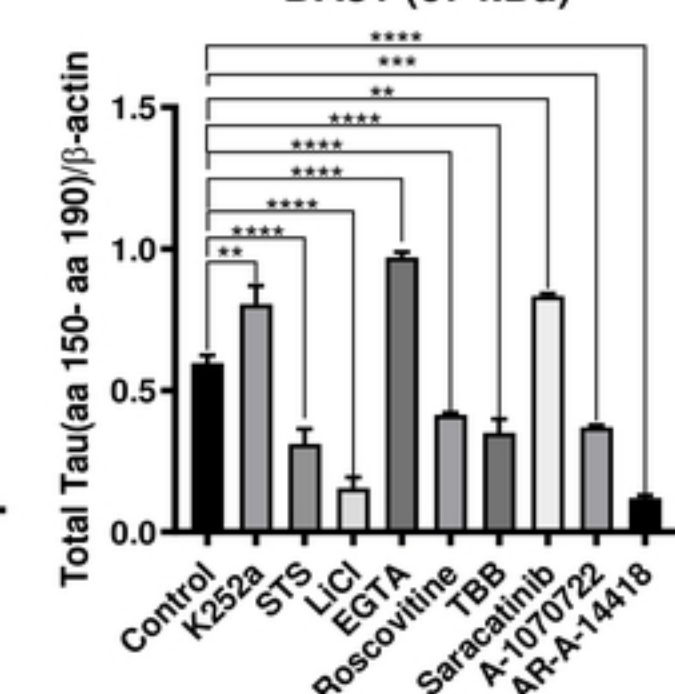

# Figure 5

**a**

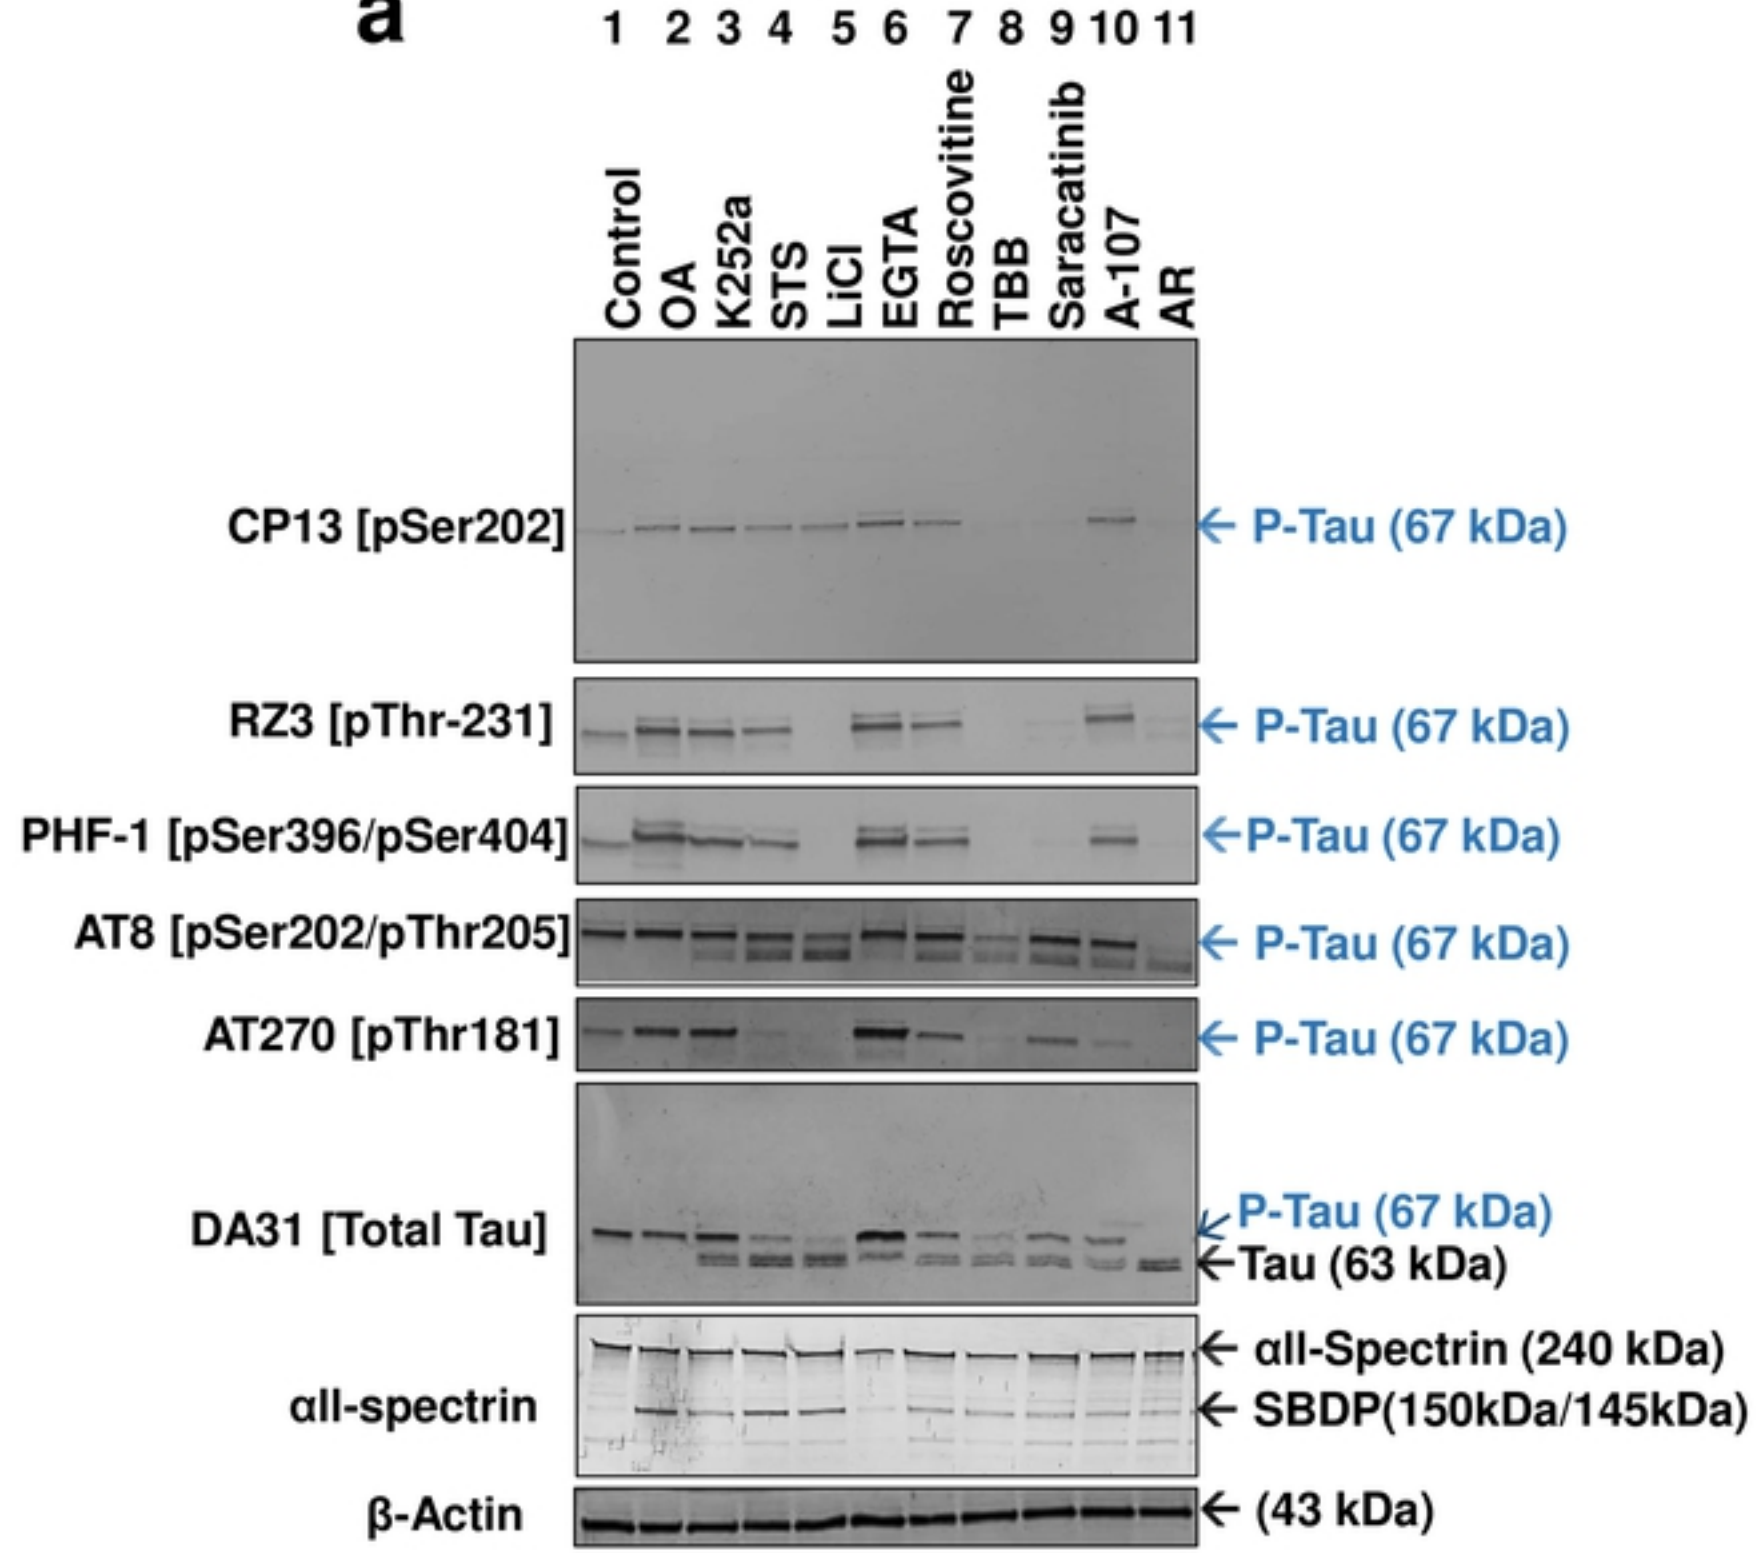

# Figure 5

## b

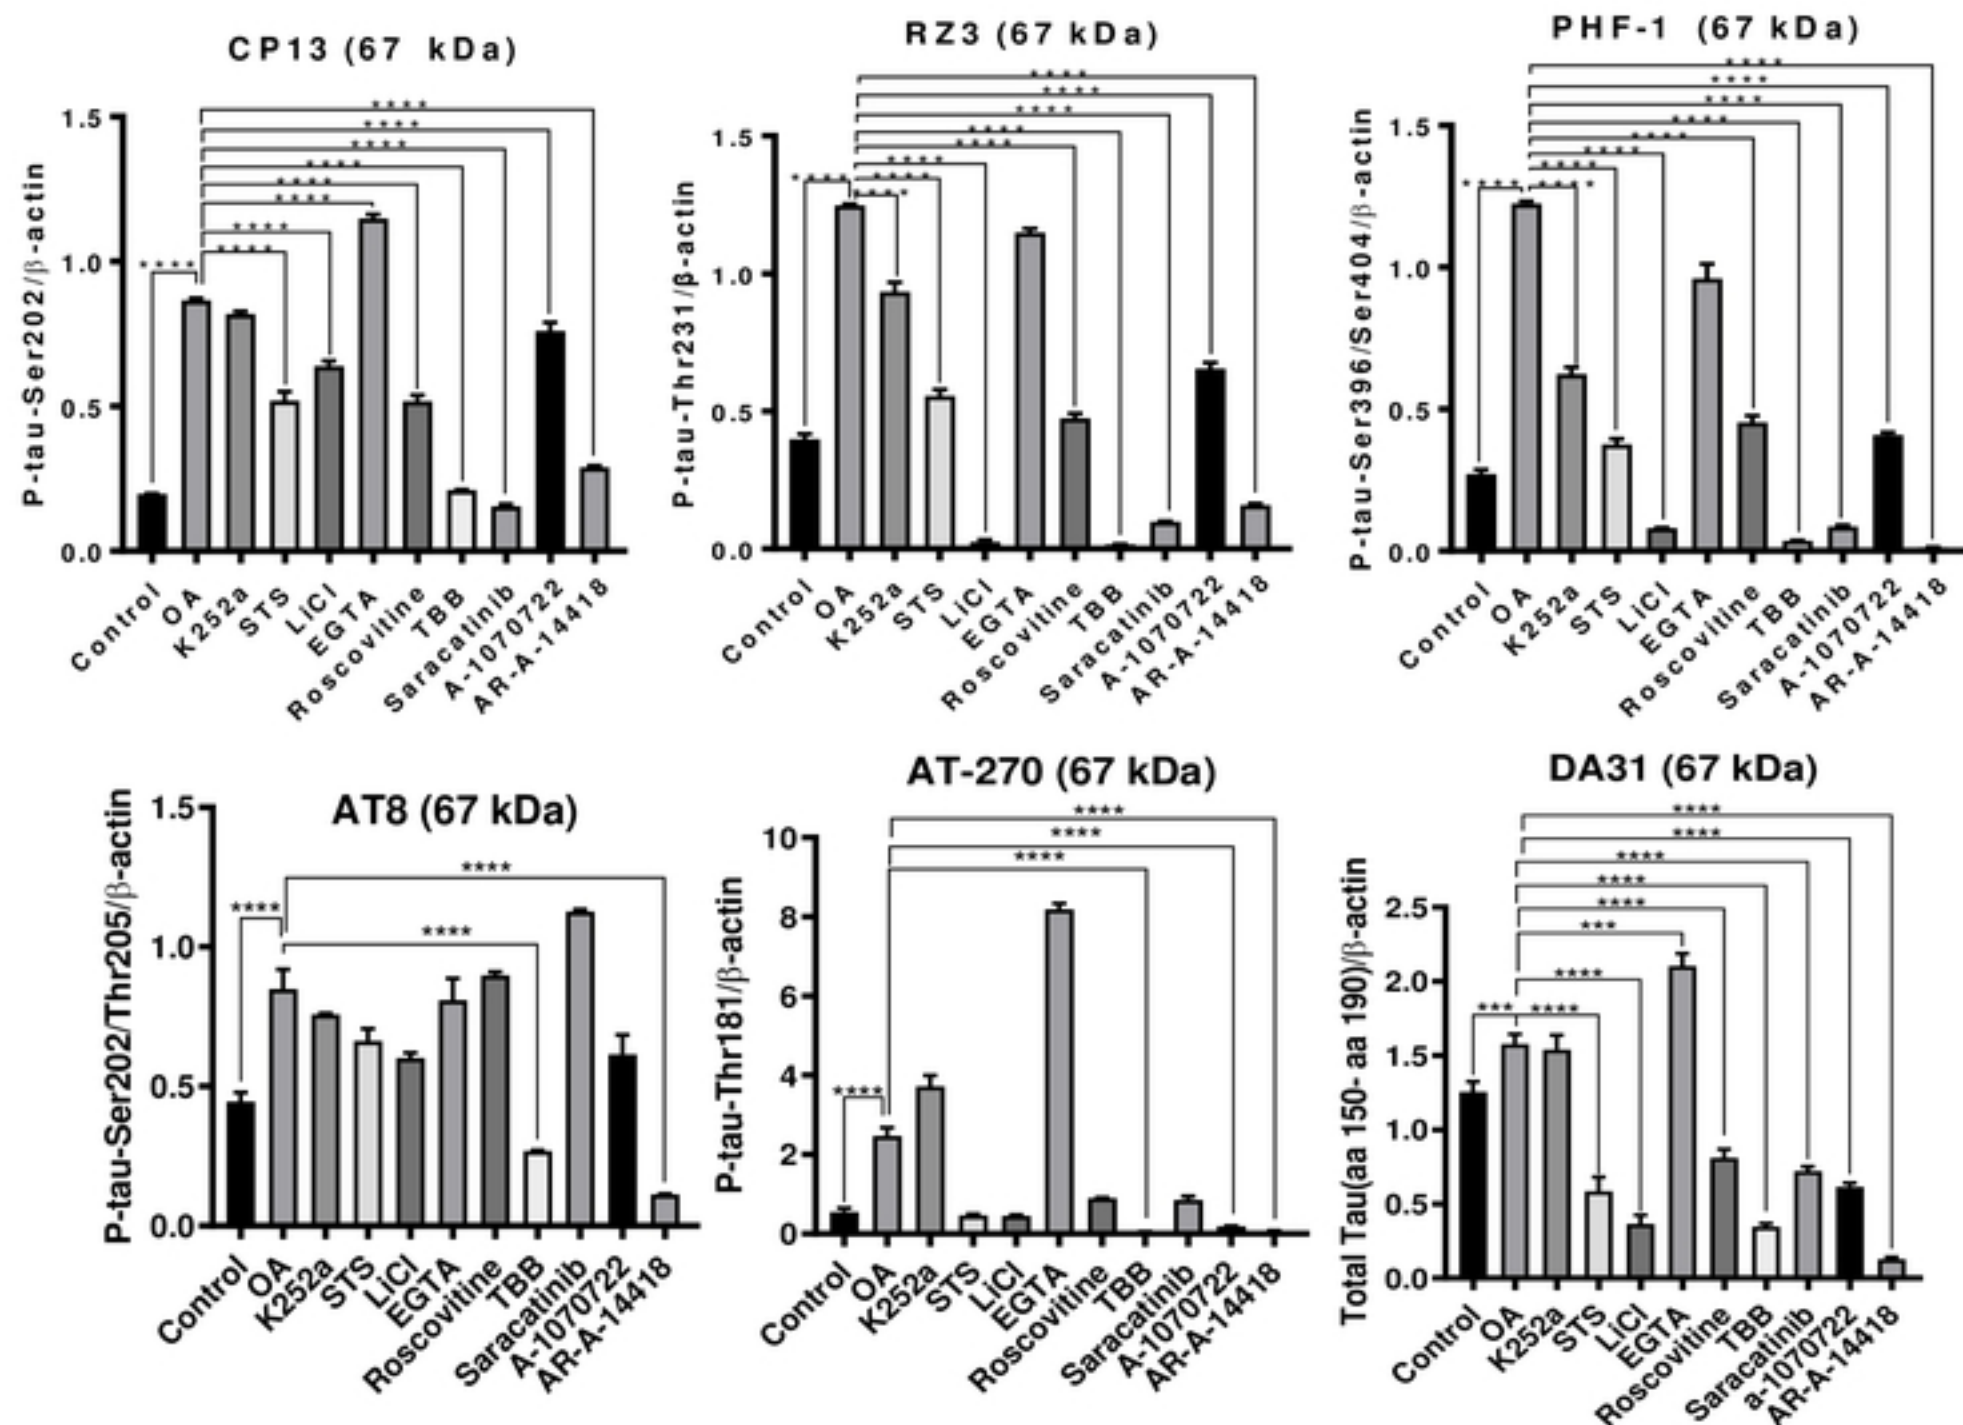

# Figure 6

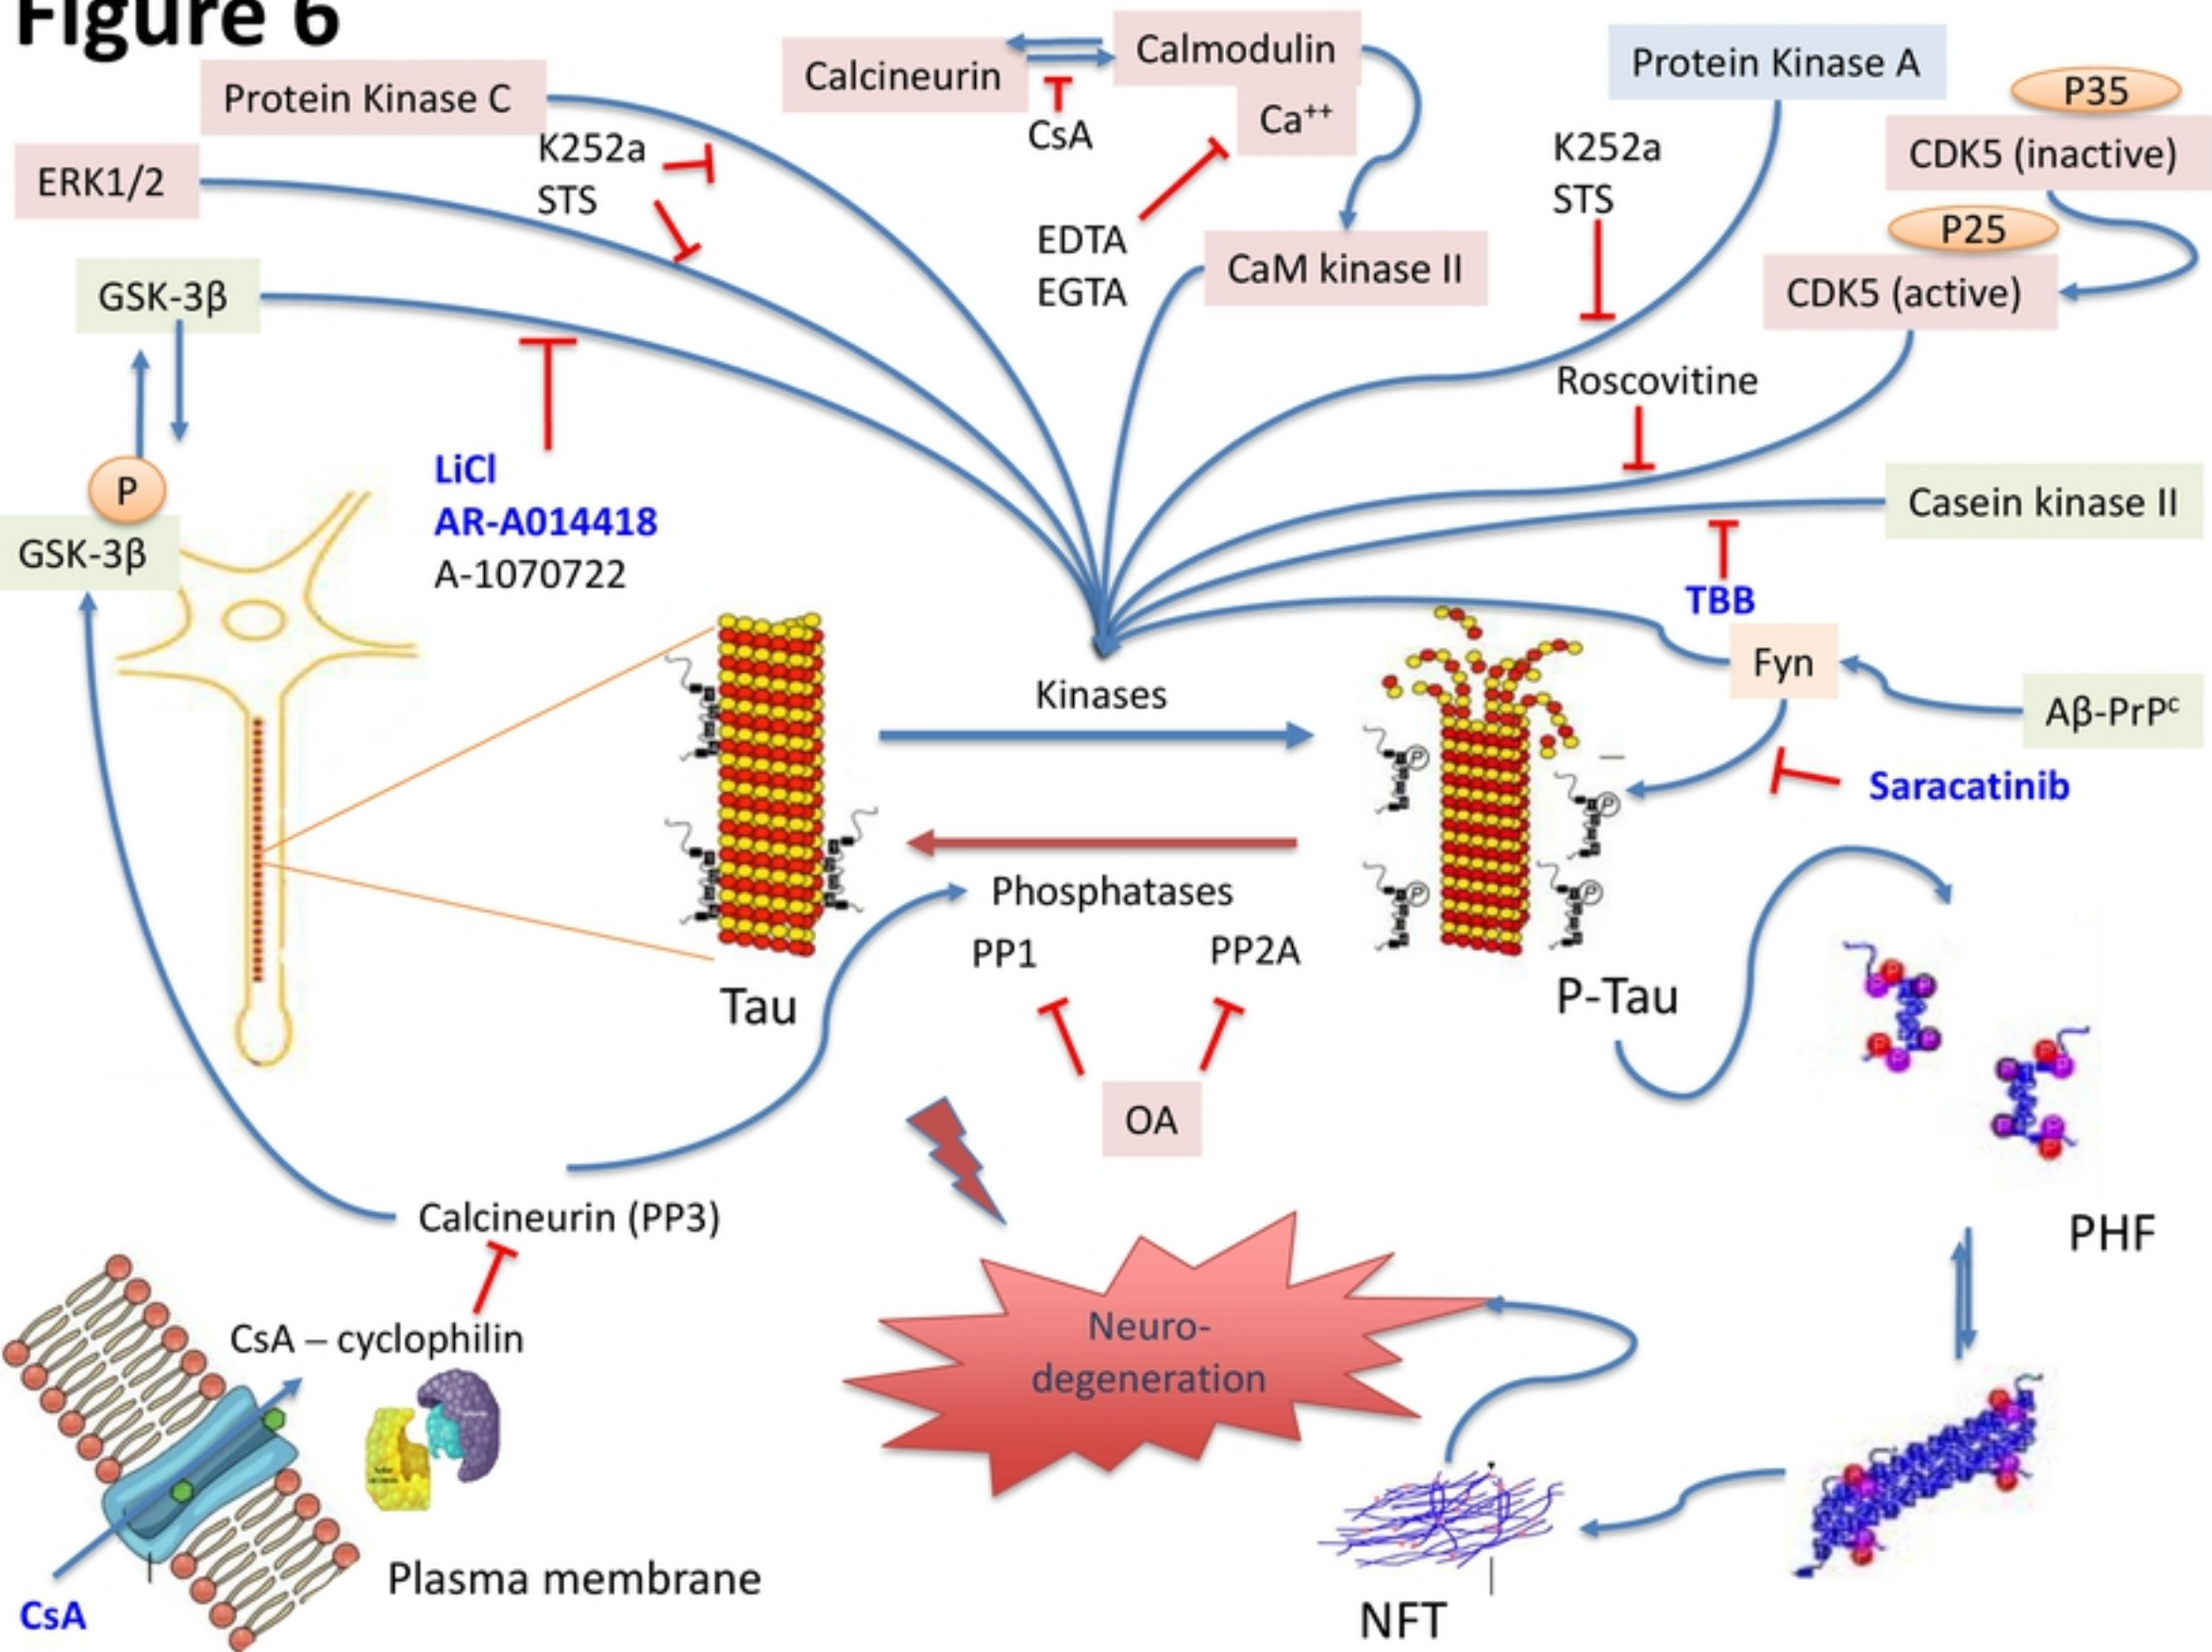

Source: https://www.biorxiv.org/content/biorxiv/early/2019/10/28/821389.full.pdf
